# 1 **Informational Masking Can Constrain Acoustically Guided Mating Behavior**

2

3 Saumya Gupta\*<sup>1</sup> and Mark A. Bee<sup>2</sup>

4 <sup>1</sup>Department of Ecology, Evolution, and Behavior, University of Minnesota, Saint Paul, MN

5 55108, USA

6 <sup>2</sup>Graduate Program in Neuroscience, University of Minnesota, Minneapolis, MN 55455, USA

7 \*Correspondence: [saumya1692@gmail.com](mailto:saumya1692@gmail.com)

8

## 9 **Abstract**

10 Noisy social environments constrain human speech intelligibility in two primary ways: spectro-  
11 temporal overlap between signals and noise reduces speech audibility (“energetic masking”)  
12 and noise interferes with processing the informative features of otherwise audible speech  
13 (“informational masking”). To date, informational masking has not been investigated in studies  
14 of vocal communication in nonhuman animals, even though their behavioral decisions frequently  
15 depend on extracting information from vocalizations in noisy aggregations. In this study of a  
16 treefrog, in which females chose mates in noisy breeding choruses, we investigated whether  
17 informational masking can disrupt the processing of signal information in the contexts of species  
18 recognition and sexual selection. We observed significant reductions in response to the  
19 vocalizations of a potential mate when they were broadcast concurrently with other biologically  
20 relevant sounds designed to reduce or eliminate energetic masking. These effects were more  
21 pronounced when competing sounds were present in a particularly salient frequency range for  
22 processing vocalizations. Among responsive subjects, however, performance in signal  
23 recognition and discrimination tasks remained largely unchanged. These results confirm that  
24 informational masking is a general communication problem among humans and other animals  
25 and suggest it may be a crucial yet understudied source of selection shaping the evolution of  
26 animal communication.

27

28

29

30

31

32

33

34

## 35 Introduction

36

37 Noise is ubiquitous in natural environments and profoundly impacts all animals that rely on  
38 auditory perception for communication and other essential activities (Brumm, 2013; Brumm &  
39 Slabbekoorn, 2005; Wiley, 2015). In humans, competing sounds from multiple talkers and other  
40 sources can make conversations in crowded social settings difficult (Bronkhorst, 2015;  
41 Dimitrijevic et al., 2019; Middlebrooks et al., 2017) and can negatively affect cognitive  
42 performance in children (Klatte et al., 2013). In comparison, the consequences of noise-induced  
43 perceptual impairments are potentially more severe in nonhuman animals. Biotic and abiotic  
44 sounds in the environment potentially impact an animal's survival and reproduction by impairing  
45 its ability to detect (Lohr et al., 2003; Pohl et al., 2009), localize (Lee and Mason, 2017),  
46 recognize (Lee et al., 2017), and discriminate (Tanner and Bee, 2020; Wollerman and Wiley,  
47 2002) among biologically important sounds in a variety of evolutionarily consequential contexts,  
48 such as mate choice (Bent et al., 2021; Gurule-Small and Tinghitella, 2018), prey detection  
49 (Schaub et al., 2008; Siemers and Schaub, 2011), and threat evasion (Simpson et al., 2016).  
50 However, our current knowledge of how nonhuman animals solve problems related to hearing  
51 and communicating in noise remains limited. To discover the diversity of evolutionary  
52 adaptations that allow animals to mitigate the impacts of noise, we must first understand the  
53 myriad ways noise imposes constraints on acoustic signal perception.

54 In a noisy environment where multiple sound sources are present, sound pressure  
55 waves from distinct sources combine to form one composite waveform that impinges on each  
56 tympanum. To recognize a target signal in this mixture, the auditory system must decompose  
57 the composite waveform into representations of discrete sounds and analyze each sound to  
58 extract features that convey relevant information (Bregman, 1990; McDermott, 2009). In  
59 vertebrates, the crucial first step of decomposition occurs in the inner ears, where different  
60 frequencies in the complex mixture are segregated by tonotopically organized auditory filters,  
61 each responding to a specific frequency range (Dooling et al., 2000; Lewis and Narins, 1999;  
62 Oxenham, 2013). When the sound energy of the signal and noise stimulates the same auditory  
63 filter at the same time, the two sounds directly compete on the auditory nerve (Recio-Spinoso  
64 and Cooper, 2013). In such cases, if the response of the auditory nerve in the presence of a  
65 signal does not change from its response to noise alone, the signal is rendered undetectable,  
66 and “energetic masking” is said to occur (Kidd et al., 2008; Middlebrooks et al., 2017). In the  
67 sensory ecology literature, energetic masking is so frequently used to explain the detrimental  
68 effects of extraneous noise on auditory perception that the general term “masking” is frequently



69 used synonymously with energetic masking (Barber et al., 2010; Erbe et al., 2016; Luther and  
70 Gentry, 2013). However, a unitary concept of masking based on signal detection at the  
71 periphery ignores the tremendous potential for noise to interfere with mechanisms operating at  
72 central levels of the auditory system responsible for processing the biologically informative  
73 features of otherwise audible signals (Rosa & Koper, 2018).

74         Research on human hearing demonstrates how noise can interfere with signal  
75 processing at both peripheral and central levels of the nervous system (Amiri & Jarollahi, 2020;  
76 Durlach et al., 2003; Kidd, 1994; Kidd et al., 2008; Shinn-Cunningham, 2013). Even when  
77 signals and noise differ sufficiently in frequency so as to produce little or no competing  
78 excitation in the periphery, noise can still make it difficult for the listeners to focus on the target  
79 signal when it shares other features with the signal, such as similar temporal patterns (Kidd,  
80 1994), common spatial origin (Freyman et al., 2001; Ihlefeld and Shinn-Cunningham, 2008), and  
81 common onset/offset times (Neff & Dethlefs, 1995). This form of feature-based masking —  
82 termed “informational masking” — does not result from an impaired ability to detect signals in  
83 noise at the periphery but from an inability of central mechanisms to accurately process the  
84 informative features of audible signals. Mechanistically, informational masking is thought to  
85 occur because the simultaneous processing of signals and noise sharing similar features  
86 interferes with a listener’s ability to extract relevant information from signals (Gutschalk et al.,  
87 2008; Scott et al., 2004; Shinn-Cunningham, 2013). Studies of speech perception suggest  
88 informational masking may be a primary contributor to the so-called “cocktail party problem,”  
89 which refers to the difficulty we have understanding speech in noisy social environments (Best  
90 et al., 2020; Bronkhorst, 2015; Brungart et al., 2006; Carlile & Corkhill, 2015; Freyman et al.,  
91 2005; Lidestam et al., 2014).

92         As in humans (McDermott, 2009; Middlebrooks et al., 2017), many other animals, such  
93 as insects (Römer, 2013; Schmidt and Balakrishnan, 2015), frogs (Bee, 2015; Schwartz and  
94 Bee, 2013; Vélez et al., 2013b), and birds (Aubin and Jouventin, 1998; Klump, 1996), also  
95 communicate in cocktail-party-like scenarios where multiple individuals simultaneously produce  
96 acoustic signals in large social groups (reviewed in Bee & Micheyl, 2008; Hulse, 2002).  
97 However, ecological and evolutionary studies of animal communication in noise typically focus  
98 on understanding how animals are adapted to reduce the effects of energetic masking in their  
99 natural environments (Feng et al., 2006; Hage et al., 2013; Hotchkin & Parks, 2013; Lee et al.,  
100 2021). Compared with our current understanding of how informational masking impacts human  
101 speech perception, we have limited knowledge of the extent to which informational masking  
102 impacts communication in other animals (Rosa and Koper, 2018). Consequently, the extent to

103 which informational masking represents a general communication problem shared by humans  
104 and other animals that acts as a potent source of natural selection on animal communication  
105 systems remains unknown.

106 Here, we tested the hypothesis that informational masking can disrupt the processing of  
107 biologically informative features in the vocal signals of a nonhuman animal. Specifically, we  
108 asked whether, in conditions of reduced energetic masking, a potential informational masker  
109 could disrupt the ability of females of Cope's gray treefrog, *Hyla chrysoscelis*, to process  
110 temporal features in a male's sexual advertisement calls related to species identity (Experiment  
111 1) and mate quality (Experiment 2). Auditory perception in this species has been well studied in  
112 the contexts of acoustically-mediated mate choice and communication in noisy environments  
113 (reviews in Bee, 2015; Bee & Christensen-Dalsgaard, 2016; Gerhardt, 2001; Gerhardt & Huber,  
114 2002). Male gray treefrogs aggregate in mixed-species breeding choruses each spring where  
115 they attract mates by producing sequences of loud advertisement calls (~85 dB SPL at 1 m)  
116 consisting of a short train of pulses (Fig 1; Gerhardt, 1975; Nityananda & Bee, 2011; Ward et  
117 al., 2013a). High levels of background noise and extensive call overlap — both by conspecific  
118 males and by males of other species that also produce pulsatile calls at different spectral  
119 frequencies — are commonplace in mixed species choruses (Kuczynski et al., 2010;  
120 Nityananda & Bee, 2011; Tanner & Bee, 2019). In these environments, females recognize and  
121 discriminate among potential males using information encoded by temporal features of  
122 advertisement calls (Bush et al., 2002; Gerhardt, 1994; Gupta & Bee, 2021; Nityananda & Bee,  
123 2011; Schul & Bush, 2002; Ward et al., 2013a). However, chorus noise and overlapping calls  
124 can interfere with signal recognition and discrimination (Bee, 2008; Bee & Schwartz, 2009; Lee  
125 et al., 2017; Vélez et al., 2013a; Vélez & Bee, 2010).

126 Like most frogs, female gray treefrogs initiate mating by exhibiting phonotaxis toward  
127 sounds recognized as an advertisement calls of their own species, and they exhibit  
128 discrimination among potential mates with different call properties via selective phonotaxis  
129 toward one calling male over one or more competing males (Gerhardt, 1995; Gerhardt & Huber,  
130 2002). According to the informational masking hypothesis, we predicted that, even under  
131 conditions designed to reduce energetic masking, concurrent pulsatile sounds would disrupt call  
132 recognition and discrimination, as evidenced by changes in phonotaxis behavior. We tested this  
133 prediction by exploiting the following key features of gray treefrog hearing and communication.  
134 Each pulse in the male's pulsatile advertisement call consist of two harmonically related spectral  
135 components with frequencies of about 1.25 and 2.5 kHz (Fig.1; Ward et al., 2013a). However,  
136 females do not require both frequencies to recognize and discriminate between calls, and they

137 readily respond to artificial signals having just one of the two spectral components (Bee, 2010;  
138 Gerhardt et al., 2007; Nityananda & Bee, 2011). The key to our experimental design stems from  
139 the fact that the two spectral components are primarily transduced by different sensory organs  
140 in the frog inner ear. Frogs and other amphibians are unique among vertebrates in having two  
141 sensory organs, the amphibian papilla (AP) and the basilar papilla (BP), that transduce airborne  
142 sounds of different frequencies (Lewis and Narins, 1999; Simmons et al., 2006). In gray  
143 treefrogs, the lower spectral component (~1.25 kHz) is transduced primarily by the AP (range of  
144 sensitivity ~0.5 to 1.8 kHz), and the higher component (~2.5 kHz) is transduced primarily by the  
145 BP (range of sensitivity ~1.4 to 4.0 kHz) (Fig 1; Hillery, 1984; Schrode et al., 2014). Together,  
146 these features allowed us to test the informational masking hypothesis by delivering target  
147 signals and potential maskers in different frequency regions transduced by different inner ear  
148 papillae, thereby reducing the potential influence of peripheral energetic masking on behavioral  
149 responses.  
150

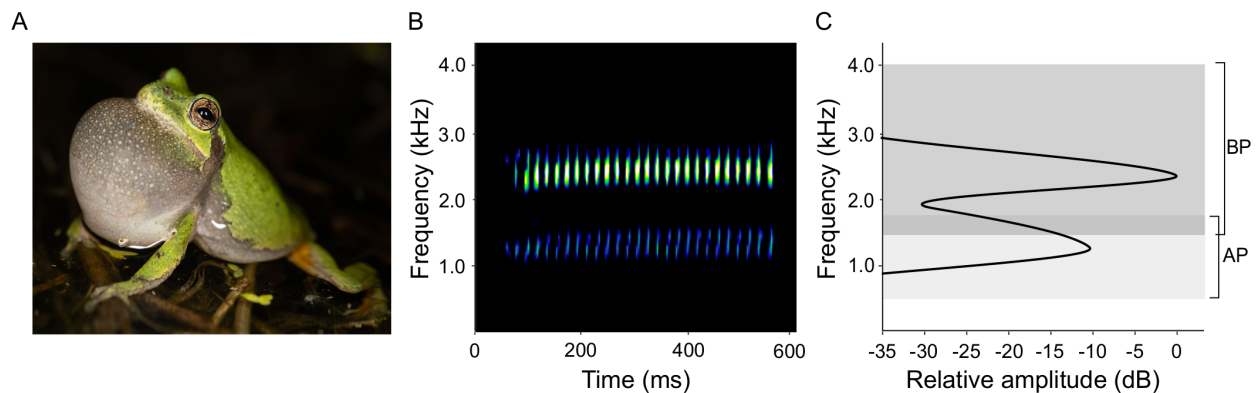

151

**Fig. 1: Natural advertisement call of male *H. chrysoscelis*.** (A) Picture of a calling male *Hyla chrysoscelis* (photo credit: Alex Baugh). (B) Spectrogram illustrating the pulsatile temporal pattern and frequency composition of a natural advertisement call. (C) Power spectrum illustrating the high and the low spectral peaks of the advertisement call depicted in (B) relative to the approximate frequency ranges of the basilar papilla (BP; dark gray) and amphibian papilla (AP; light gray), respectively (after Hillery, 1984; Schrode et al., 2014).

152

## 153 Results

### 154 Experiment 1: Informational Masking and Signal Recognition

155 In Cope's gray treefrog, females must correctly perceive the pulsed structure of a call to  
156 recognize it as that of a male of her species (Schul & Bush 2002; Kuczynski et al. 2010). The  
157 male's advertisement call consists of a pulse train of 12 to 43 pulses (mean = 30 pulses/call)  
158 produced at an average pulse rate of 50 pulses/s (Ward et al., 2013a). Females must hear a  
159 threshold number of pulses produced at a conspecific pulse rate before exhibiting a phonotaxis

160 response indicating recognition of the call (Gupta et al., 2021; Vélez & Bee, 2011). In  
161 Experiment 1, we used an adaptive tracking procedure (Gupta et al., 2021) to test the prediction  
162 that pulsatile sounds at remote frequencies impair signal recognition, as evidenced by lower  
163 response rates, elevated pulse number thresholds, and longer response latencies compared  
164 with quiet and a control masking condition lacking pulsatile sounds. Target signals were  
165 presented in quiet (Fig. 2A) and in one of two masking conditions (Fig. 2B, C). The target signal  
166 consisted of a train of up to 20 identical pulses, each with a species-typical amplitude envelope  
167 and a frequency that was fixed at either 1.25 kHz (AP range) or 2.5 kHz (BP range). In the  
168 informational masking condition (Fig. 2B), the target signal was presented concurrently with a  
169 separate train of random-frequency pulses produced at a rate (25 pulses/s) that was half that of  
170 the target signal (50 pulses/s). Each pulse of the informational masker had the same amplitude  
171 envelope as each pulse in the target signal but was restricted to the opposite frequency range  
172 with respect to the frequency tuning of the AP and BP (Fig. 2B). The slower pulse rate of the  
173 informational masker was chosen to approximate the relatively unattractive pulse rate typical of  
174 the spectrally similar calls of the closely related eastern gray treefrog (*Hyla versicolor*), which *H.*  
175 *chrysoscelis* females frequently hear in mixed-species choruses but find far less attractive than  
176 conspecific calls (Bee 2008; Nityananda & Bee 2011; Bush et al. 2002; Schul & Bush 2002).  
177 Each pulse in the informational masker was temporally centered in the interval following every  
178 other pulse in the target signal such that there was no spectral or temporal overlap between the  
179 pulses of the target signal and informational masker. The non-overlapping spectral and temporal  
180 relationships between the target signal and informational masker were chosen specifically to  
181 minimize the potential for the informational masker to cause energetic masking through both  
182 simultaneous spectro-temporal overlap and non-simultaneous effects, such as forward masking  
183 (Hillery & Fay 1982). In a separate masking condition (Fig. 2C), the target signal was presented  
184 concurrently with a band-limited noise having the same amplitude and long-term spectrum as  
185 the informational masker. By also testing this masking condition, we attempted to control for any  
186 possible effects of energetic masking because it stimulated the auditory system with the same  
187 overall acoustic energy as the informational masker but was unlikely to interfere with call  
188 recognition due to its lack of information-carrying temporal features. Thus, we generally  
189 expected performance in the informational masking condition to be reduced relative to quiet and  
190 the control masking condition, which we expected to be similar.

191         Across different groups of subjects, we used two stimulus configurations to examine how  
192 signal information processed through different peripheral channels might be differentially  
193 susceptible to informational masking (left and right panels of Fig. 2). In the “low-signal/high-

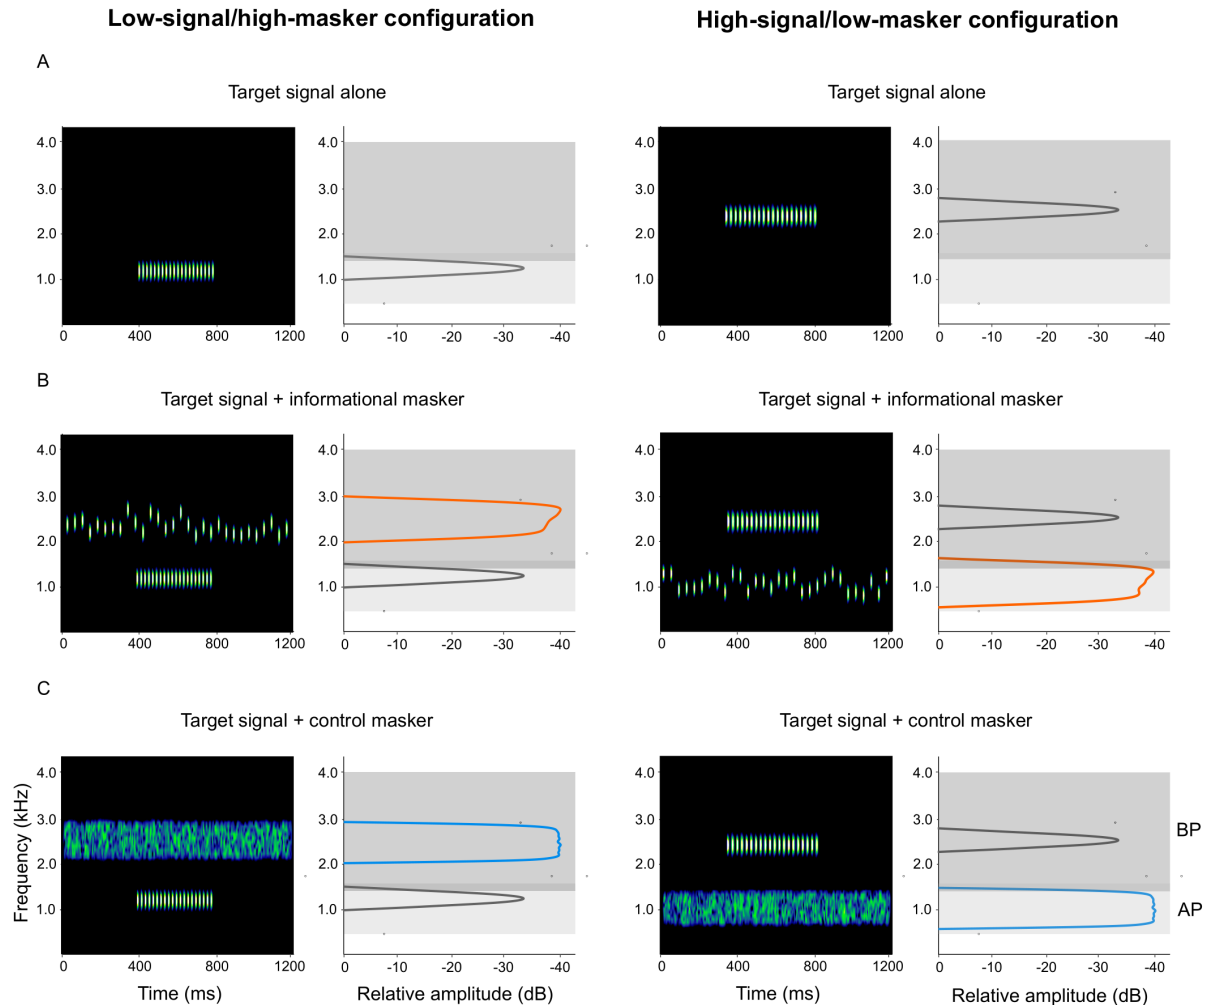

**Fig. 2: The three masking conditions.** Left and right panels illustrate spectrograms and power spectra of target signals and maskers in the low-signal/high-masker and high-signal/low-masker stimulus configurations, respectively. In the low-signal/high-masker configuration, target signals were in the AP range (light gray) and maskers were in the BP range (dark gray). In the high-signal/low-masker configuration, target signals were in the BP range and maskers were in the AP range. (A) Quiet condition in which a target signal with a pulse rate of 50 pulses/s was presented alone. The carrier frequency of the target signal was fixed at either 1.25 kHz (low-signal/high-masker configuration) or 2.5 kHz (high-signal/low-masker configuration) so that it would primarily stimulate one of the two papillae. (B) Informational masking condition in which the target signal was presented concurrently with a spectrally separated and temporally interleaved random-frequency pulse train (informational masker) with a pulse rate of 25 pulses/s. The frequency range of this informational masker fell within the sensitivity range of the papilla that was opposite to the one that was primarily stimulated by the target signal. (C) Control masking condition in which the target signal was presented concurrently with a band-limited noise (control masker) that had a frequency spectrum similar to that of the informational masker and was presented for the same duration. Gray, orange, and blue curves on the power spectra depict the frequencies in the target signals, informational maskers, and control maskers, respectively.

194 masker” configuration, the target signal was fixed at 1.25 kHz (AP range), and frequencies in  
 195 the maskers ranged between 2.1 to 2.8 kHz (BP range). In the “high-signal/low-masker”  
 196 configuration, the target signal was fixed at 2.5 kHz (BP range), and frequencies in the maskers  
 197 ranged between 0.7 to 1.4 kHz (AP range). All three conditions (quiet, informational masking,

198 and control masking) and both stimulus configurations were replicated factorially at signal-to-  
199 noise ratios (SNRs; or equivalent signal levels in quiet) of -12 dB, -6 dB, and 0 dB. Masker  
200 levels were fixed at 75 dB SPL ( $LC_{eq}$  re 20  $\mu$ Pa), and the amplitude of the target signal was  
201 varied. Because response rates ( $\chi^2 = 16.5$ ,  $p < 0.001$ ), pulse number thresholds ( $\chi^2 = 28.9$ ,  $p <$   
202  $0.001$ ), and response latencies ( $\chi^2 = 28.9$ ,  $p < 0.001$ ) differed significantly between the two  
203 stimulus configurations, we analyzed results for each configuration separately.

204 In the low-signal/high-masker configuration, 95.1% of subjects (136 of 143) tested in  
205 quiet and 89.5% of subjects (51 of 57) tested in control masking conditions responded to a  
206 target signal having 20 or fewer pulses (Fig. 3A). In contrast, only 54.7% of subjects (47 of 86)  
207 tested in the informational masking condition did so (Fig. 3A). The response rate in the  
208 informational masking condition was significantly lower compared with that in both quiet (GEE:  $\beta$   
209  $= -2.72$ ,  $p < 0.001$ ) and the control masking condition (GEE:  $\beta = -1.74$ ,  $p < 0.001$ ). The  
210 difference in response rate between quiet and the control masking condition, while much  
211 smaller than that between quiet and the informational masking condition, was also statistically  
212 significant ( $\beta = -0.97$ ,  $p = 0.032$ ). Neither SNR ( $\chi^2 = 1.30$ ,  $p = 0.520$ ) nor the interaction of  
213 masking condition and SNR ( $\chi^2 = 1.08$ ,  $p = 0.900$ ) had significant effects on response rate based  
214 on comparing models with these effects to one with masking condition as the only predictor  
215 variable. Differences in response rates were not due to treatment order effects ( $\chi^2 = 1.30$ ,  $p =$   
216  $0.520$ ). We did not investigate responses to target signals with more than 20 pulses because  
217 this value already exceeded both the minimum number of pulses per call (12 pulses) we have  
218 recorded in local populations (Ward et al., 2013) and the maximum pulse number threshold (16  
219 pulses) we have measured in response to target signals with both spectral peaks (Gupta et al.  
220 2021).

221 Among those subjects that responded to target signals in both quiet and a masking  
222 condition in the low-signal/high-masker configuration, the informational masker had little impact  
223 on pulse number thresholds (Fig. 3B; Table 1) and no impact on response latency (Fig. 3C;  
224 Table 1). We analyzed these data using a series of paired and independent-sample Wilcoxon  
225 tests (with corrections for multiple comparisons) because the distributions of pulse number  
226 threshold and response latency were non-normal; paired tests were used to compare responses  
227 obtained from the same subject in quiet and in one of the masking conditions. At an SNR of -6  
228 dB, we found a significant increase in pulse number threshold in the informational masking  
229 condition compared with both quiet (Paired Wilcoxon test:  $V = 4$ ,  $p = 0.021$ ) and the control



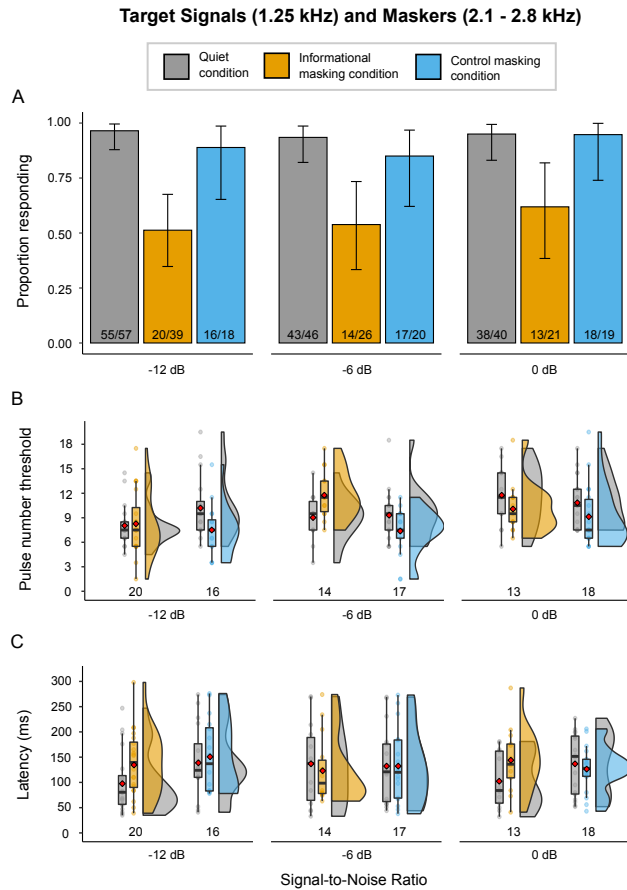

**Fig. 3: In Experiment 1, informational masking reduced the ability to recognize species-specific calls when the target signal was presented in the AP range and the masker was presented in the BP range.** Gray, orange, and blue shaded regions depict the quiet, informational masking, and control masking conditions, respectively. (A) Response rate showing the proportion ( $\pm$  95% exact binomial confidence intervals) of subjects that responded to target signals having 20 or fewer pulses at signal-to-noise ratios (SNRs) of -12 dB, -6 dB, and 0 dB. The base of each bar shows the numbers of subjects responding (numerator) and tested (denominator) in each condition. (B) Pulse number thresholds and (C) response latencies of subjects that responded to target signals in both quiet condition and in one of the two masking conditions. At each SNR, the paired box plots on the left depict the first, second (median), and third quartiles, and the mean (red diamond) values in quiet and the informational masking conditions, whereas the paired box plots on the right depict these values in quiet and the control masking conditions. The whiskers depict 1.5 times the interquartile range. The transparent points superimposed on the paired box plots depict individual data points obtained in quiet and in each masking condition. The two overlapping distributions are kernel density representations of the data that are depicted in the corresponding box plots. Sample sizes are indicated at the base of each dataset.

230 masking condition (Independent sample Wilcoxon test:  $W = 211$ ,  $p < 0.001$ ); the quiet and ns  
 231 did not differ (Paired Wilcoxon test:  $V = 103$ ,  $p = 0.073$ ). Differences in pulse number thresholds  
 232 at SNRs of -12 dB and 0 dB were not statistically different across the three conditions (Table 1).  
 233 Across all SNRs, the median (IQR) pulse number threshold of females was 9.5 pulses (7.5 –  
 234 11.5 pulses) in quiet, 9.5 pulses (7.5 – 12.0 pulses) in the informational masking condition, and  
 235 7.5 pulses (6.5 – 9.5 pulses) in the control masking condition (Fig. 3B). There were no



**Table 1:** Outcomes of Wilcoxon signed rank tests comparing pulse number thresholds and response latencies between the three conditions when signals and maskers were in configuration 1. Significant results (after correcting  $\alpha$  for multiple comparisons) are highlighted in bold. The informational masking condition is denoted as IM and the control masking condition is denoted as CM.

| Response                      | SNR    | Comparison                                 | Statistic                                                | P-value           |
|-------------------------------|--------|--------------------------------------------|----------------------------------------------------------|-------------------|
| <b>Pulse number threshold</b> | -12 dB | Quiet vs. IM ( $N = 20$ )                  | Paired Wilcoxon: $V = 88.5$                              | 0.807             |
|                               |        | Quiet vs. CM ( $N = 16$ )                  | Paired Wilcoxon: $V = 111$                               | 0.027             |
|                               |        | CM vs. IM ( $N = 16, 20$ )                 | Independent-sample Wilcoxon: $W = 172.5$                 | 0.700             |
|                               | -6 dB  | <b>Quiet vs. IM (<math>N = 14</math>)</b>  | <b>Paired Wilcoxon: <math>V = 4.5</math></b>             | <b>0.021</b>      |
|                               |        | Quiet vs. CM ( $N = 17$ )                  | Paired Wilcoxon: $V = 103$                               | 0.073             |
|                               |        | <b>CM vs. IM (<math>N = 17, 14</math>)</b> | <b>Independent-sample Wilcoxon: <math>W = 211</math></b> | <b>&lt; 0.001</b> |
|                               | 0 dB   | Quiet vs. IM ( $N = 13$ )                  | Paired Wilcoxon: $V = 65$                                | 0.182             |
|                               |        | Quiet vs. CM ( $N = 18$ )                  | Paired Wilcoxon: $V = 93.5$                              | 0.060             |
|                               |        | CM vs. IM ( $N = 18, 13$ )                 | Independent-sample Wilcoxon: $W = 148.5$                 | 0.211             |
| <b>Latency</b>                | -12 dB | Quiet vs. IM ( $N = 20$ )                  | Paired Wilcoxon: $V = 55.5$                              | 0.067             |
|                               |        | Quiet vs. CM ( $N = 16$ )                  | Paired Wilcoxon: $V = 63$                                | 0.821             |
|                               |        | CM vs. IM ( $N = 16, 20$ )                 | Independent-sample Wilcoxon: $W = 152$                   | 0.811             |
|                               | -6 dB  | Quiet vs. IM ( $N = 14$ )                  | Paired Wilcoxon: $V = 62$                                | 0.583             |
|                               |        | Quiet vs. CM ( $N = 17$ )                  | Paired Wilcoxon: $V = 68$                                | 0.712             |
|                               |        | CM vs. IM ( $N = 17, 14$ )                 | Independent-sample Wilcoxon: $W = 117$                   | 0.953             |
|                               | 0 dB   | Quiet vs. IM ( $N = 13$ )                  | Paired Wilcoxon: $V = 21$                                | 0.170             |
|                               |        | Quiet vs. CM ( $N = 18$ )                  | Paired Wilcoxon: $V = 91$                                | 0.507             |
|                               |        | CM vs. IM ( $N = 18, 13$ )                 | Independent-sample Wilcoxon: $W = 135.5$                 | 0.471             |

236 significant differences between any of the three conditions in the latency to respond to the target  
 237 signal having the lowest number of pulses that elicited phonotaxis (Fig. 3C; Table1). Across all  
 238 SNRs, the median (IQR) response latencies were 113.5 s (62.75 – 176 s) in quiet, 126 s (84 –  
 239 176.5 s) in the informational masking condition, and 120 s (83 –178 s) in the control masking  
 240 condition (Fig. 3C).

241 In the high-signal/low-masker configuration, nearly all females responded to target  
 242 signals having 20 or fewer pulses in all three masking conditions and across all three SNRs  
 243 (Fig. 4A). Averaged across SNR, the response rates were 98.5% (130 of 132) in quiet, 94.2%  
 244 (65 of 69) in the informational masking condition, and 100% (63 of 63) in the control masking  
 245 condition. Differences in response rates across masking conditions and SNRs were not  
 246 analyzed statistically because of the high and nearly uniform response rates close to 100%,  
 247 including a 100% response rate in the control masking condition across all three SNRs (Fig.  
 248 4A).

249 The informational masker had little consistent impact on pulse number thresholds for  
 250 subjects that responded in the high-signal/low masker configuration (Fig. 4B; Table 2). Across

251 all SNRs, the median (IQR) pulse number threshold was 7.5 pulses (6.5 – 9.5 pulses) in quiet,  
 252 7.5 pulses (6.5 – 10.5 pulses) in the informational masking condition, and 6.5 pulses (5.5 – 8.5  
 253 pulses) in the control masking condition (Fig. 4B). At an SNR of 0 dB, pulse number thresholds  
 254 were significantly higher in the informational masking condition relative to both quiet (Paired  
 255 Wilcoxon test:  $V = 26$ ,  $p = 0.009$ ) and the control masking condition (Independent sample  
 256 Wilcoxon test:  $W = 329$ ,  $p = 0.037$ ). However, pulse number thresholds were also significantly  
 257 lower in the control masking condition relative to quiet ( $V = 180.5$ ,  $p < 0.001$ ). Broadly

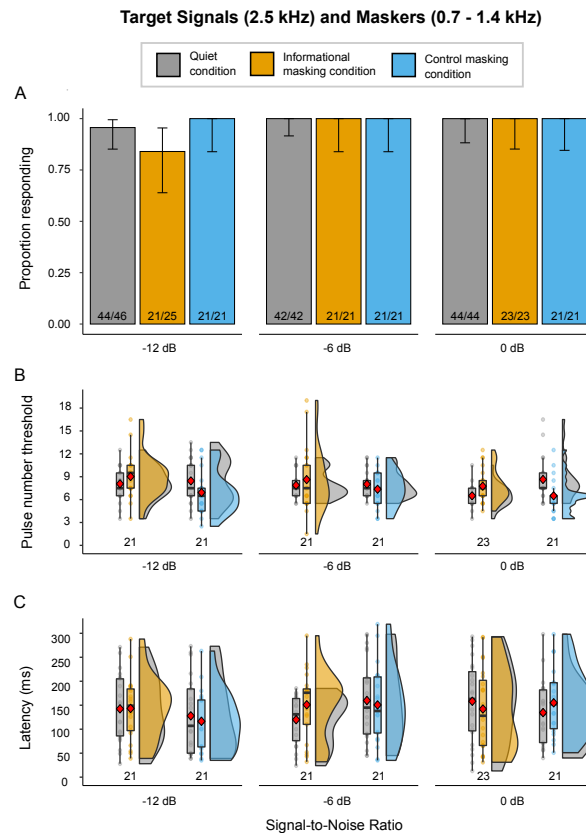

**Fig. 4: In Experiment 1, informational masking did not reduce the ability to recognize species-specific calls when the target signal was presented in the BP range and the masker was presented in the AP range.** Gray, orange, and blue shaded regions depict the quiet, informational masking, and control masking conditions, respectively. (A) Response rate showing the proportion ( $\pm$  95% exact binomial confidence intervals) of subjects that responded to target signals having 20 or fewer pulses at signal-to-noise ratios (SNRs) of -12 dB, -6 dB, and 0 dB. The base of each bar shows the numbers of subjects responding (numerator) and tested (denominator) in each condition. (B) Pulse number thresholds and (C) response latencies of subjects that responded to target signals in both quiet condition and in one of the two masking conditions. At each SNR, the paired box plots on the left depict the first, second (median), and third quartiles, and the mean (red diamond) values in quiet and the informational masking conditions, whereas the paired box plots on the right depict these values in quiet and the control masking conditions. The whiskers depict 1.5 times the interquartile range. The transparent points superimposed on the paired box plots depict individual data points obtained in quiet and in each masking condition. The two overlapping distributions are kernel density representations of the data that are depicted in the corresponding box plots. Sample sizes are indicated at the base of each dataset.

258

**Table 2:** Outcomes of Wilcoxon signed rank tests comparing pulse number thresholds and response latencies between the three conditions when signals and maskers were in configuration 2. Significant results (after correcting  $\alpha$  for multiple comparisons) are highlighted in bold. The informational masking condition is denoted as IM and the control masking condition is denoted as CM.

| Response                      | SNR    | Comparison                                | Statistic                                                | P-value           |
|-------------------------------|--------|-------------------------------------------|----------------------------------------------------------|-------------------|
| <b>Pulse number threshold</b> | -12 dB | Quiet vs. IM ( $N = 21$ )                 | Paired Wilcoxon: $V = 40.5$                              | 0.158             |
|                               |        | Quiet vs. CM ( $N = 21$ )                 | Paired Wilcoxon: $V = 147.5$                             | 0.035             |
|                               |        | CM vs. IM ( $N = 21,21$ )                 | Independent-sample Wilcoxon: $W = 314.5$                 | 0.018             |
|                               | -6 dB  | Quiet vs. IM ( $N = 21$ )                 | Paired Wilcoxon: $V = 69.5$                              | 0.495             |
|                               |        | Quiet vs. CM ( $N = 21$ )                 | Paired Wilcoxon: $V = 141$                               | 0.376             |
|                               |        | CM vs. IM ( $N = 21,21$ )                 | Independent-sample Wilcoxon: $W = 250$                   | 0.463             |
|                               | 0 dB   | <b>Quiet vs. IM (<math>N = 23</math>)</b> | <b>Paired Wilcoxon: <math>V = 26</math></b>              | <b>0.009</b>      |
|                               |        | <b>Quiet vs. CM (<math>N = 21</math>)</b> | <b>Paired Wilcoxon: <math>V = 180</math></b>             | <b>&lt; 0.001</b> |
|                               |        | <b>CM vs. IM (<math>N = 21,23</math>)</b> | <b>Independent-sample Wilcoxon: <math>W = 329</math></b> | <b>0.037</b>      |
| <b>Latency</b>                | -12 dB | Quiet vs. IM ( $N = 21$ )                 | Paired Wilcoxon: $V = 101$                               | 0.896             |
|                               |        | Quiet vs. CM ( $N = 21$ )                 | Paired Wilcoxon: $V = 118$                               | 0.641             |
|                               |        | CM vs. IM ( $N = 21,21$ )                 | Independent-sample Wilcoxon: $W = 278$                   | 0.152             |
|                               | -6 dB  | Quiet vs. IM ( $N = 21$ )                 | Paired Wilcoxon: $V = 63$                                | 0.071             |
|                               |        | Quiet vs. CM ( $N = 21$ )                 | Paired Wilcoxon: $V = 118$                               | 0.945             |
|                               |        | CM vs. IM ( $N = 21,21$ )                 | Independent-sample Wilcoxon: $W = 230$                   | 0.821             |
|                               | 0 dB   | Quiet vs. IM ( $N = 23$ )                 | Paired Wilcoxon: $V = 153$                               | 0.659             |
|                               |        | Quiet vs. CM ( $N = 21$ )                 | Paired Wilcoxon: $V = 82$                                | 0.251             |
|                               |        | CM vs. IM ( $N = 21,23$ )                 | Independent-sample Wilcoxon: $W = 207$                   | 0.424             |

259 similar patterns of differences in pulse number thresholds were also observed at SNRs of -12  
 260 dB and -6 dB (Fig. 4B), but none of these differences was statistically significant after correcting  
 261 for multiple comparisons (Table 2). The informational masker had no impact on response  
 262 latencies for subjects that responded in the high-signal/low masker configuration (Fig. 4C; Table  
 263 2). Across all SNRs, the median (IQR) response latencies were 139.5 s (76.75 – 187.0 s) in  
 264 quiet, 152 s (73.0 – 188.0 s) in the informational masking conditions, and 133 s (90.50 – 185.0 s)  
 265 in the control masking condition (Fig. 4C).

266

## 267 **Experiment 2: Informational Masking and Signal Discrimination**

268 Female frogs and other animals frequently prefer to mate with males bearing certain phenotypic  
 269 traits, such as sexual displays with more elaborate or exaggerated features, which can reflect  
 270 aspects of higher male quality (Gerhardt & Huber 2002; Rosenthal 2017). In both Cope's and  
 271 eastern gray treefrogs, females discriminate among the calls of different conspecific males  
 272 based on differences in call duration; they prefer males that produce longer calls consisting of  
 273 more pulses (Bee, 2008; Gerhardt, 1994; Lee et al., 2017; Ward et al., 2013a). In eastern gray

274 treefrogs, pulse number is heritable (Welch et al., 2014), and males producing longer calls sire  
275 offspring with higher fitness (Welch et al., 1998). In Experiment 2, we used two-alternative  
276 choice tests (Gerhardt 1995) to test the prediction that pulsatile sounds at remote frequencies  
277 impair signal discrimination, as evidenced by reduced expression of female preferences for  
278 longer calls, compared with quiet and a control masking condition lacking pulsatile sounds.

279 We conducted a series of four, two-alternative choice tests in which we presented  
280 subjects with a choice between two alternating target signals that differed in pulse number but  
281 were otherwise identical. The shorter alternative had an absolute pulse number of either 8, 12,  
282 16, or 24 pulses, and the longer alternative had 25% more pulses, corresponding to absolute  
283 pulse numbers of 10, 15, 20, or 30 pulses, respectively. The two target signals were alternated  
284 in time to simulate two calling males. Each two-alternative choice test was replicated at all six  
285 factorial combinations of the two signal-masker configurations and three masking conditions  
286 (quiet, informational masking, and control masking) (see Fig. 2). In each masking condition, the  
287 same rendition of the masker was presented concurrently with each of the target signals within  
288 each successive pair of alternating target signals but varied randomly between successive pairs  
289 of the two signals over the duration of the choice test. Because we did not observe systematic  
290 differences in response rate, pulse number threshold, or response latency as a function of SNR  
291 in Experiment 1, we conducted Experiment 2 at a single SNR (-6 dB; maskers at 75 dB SPL and  
292 target signals at 69 dB SPL). In each choice test, we recorded whether a subject made a choice  
293 by selectively responding to one of the two target signals and scored its response as binary  
294 (shorter or longer) when a choice was made. Across all four choice tests and across both  
295 stimulus-masker configurations, 78.5% (113 of 144) of subjects that made a choice in quiet  
296 chose the longer call, resulting in an overall preference ratio of 3.6:1 in favor of the longer call in  
297 the absence of a masker. This result corroborates preferences for longer calls demonstrated in  
298 earlier studies (Bee, 2008; Gerhardt, 1994; Lee et al., 2017; Ward et al., 2013a) and established  
299 a baseline for the expectation that informational masking would lead to reduced preferences for  
300 longer calls. Stimulus configuration influenced response rate, defined as the proportion of  
301 subjects that made a choice ( $\chi^2 = 42.6$ ,  $p < 0.001$ ), and the proportion of responsive subjects  
302 that chose the longer target signal ( $\chi^2 = 3.96$ ,  $p = 0.047$ ); therefore, as in Experiment 1, we  
303 analyzed responses in the two stimulus configurations separately.

304 In the low-signal/high-masker configuration (Fig. 5A), neither the absolute pulse  
305 numbers of the two alternative target signals in a choice test ( $\chi^2 = 3.78$ ,  $p = 0.290$ ), nor the  
306 interaction of absolute pulse number with masking condition ( $\chi^2 = 10.00$ ,  $p = 0.120$ ) had  
307 significant effects on subject response rates. Averaged across all four choice tests, subjects

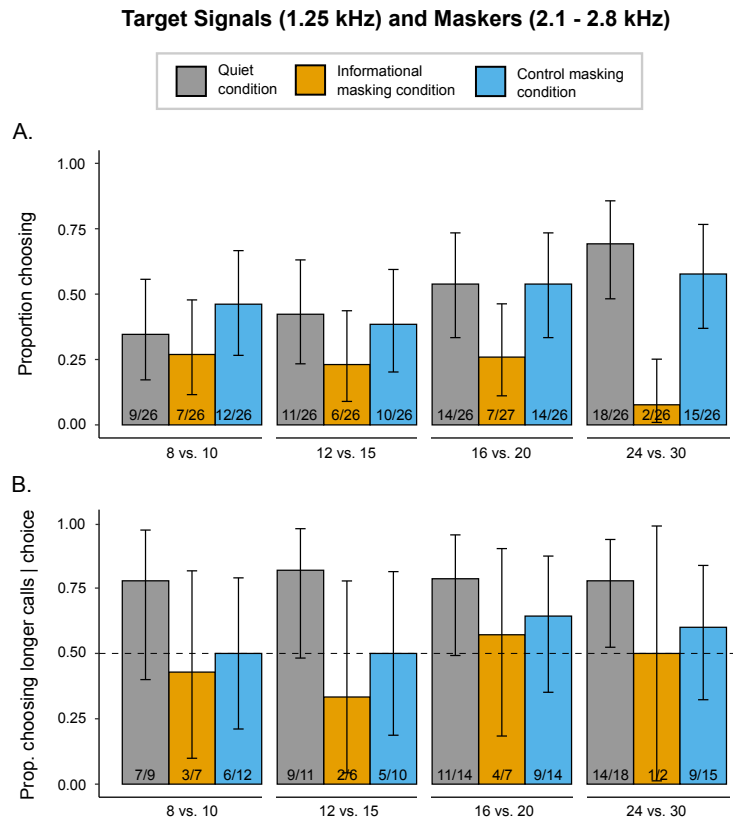

**Fig. 5: In Experiment 2, informational masking reduced response rates and impaired pulse number discrimination when target signals were presented in the AP range and maskers were presented in the BP range.** Gray, orange, and blue shaded regions depict the quiet, informational masking, and control masking conditions, respectively. (A) Response rates showing the proportions ( $\pm$  95% exact binomial confidence intervals) of subjects tested that chose between two alternating target signals differing in pulse number. The base of each bar shows the numbers of subjects choosing (numerator) and tested (denominator) in each condition. (B) Probability of choosing the longer call depicted by the proportions ( $\pm$  95% exact binomial confidence intervals) of subjects that chose the longer call over the shorter alternative. The base of each bar shows the numbers of subjects choosing the longer signal (numerator) and the total number that made a choice (denominator) in each condition.

308 made choices in 50.0% of tests (52 of 104) in quiet and 49.0% of tests (51 of 104) in the control  
 309 masking condition, and response rates in these two conditions did not differ (GEE:  $\beta = -0.04$ ,  $p =$   
 310 0.884). In contrast, the response rate was just 20.9% (22 of 105) in the informational masking  
 311 condition, which was significantly lower than response rates in quiet (GEE:  $\beta = -1.36$ ,  $p < 0.001$ )  
 312 and in the control masking condition (GEE:  $\beta = -1.32$ ,  $p < 0.001$ ).

313 Among those subjects that made a choice in the low-signal/high-masker configuration  
 314 (Fig. 5B), the ratio of choices favoring the longer alternative (i.e., longer:shorter) was highest in  
 315 quiet (3.7:1), lowest in the informational masking condition (0.8:1), and intermediate in the  
 316 control masking condition (1.3:1), after combining data across the four different choice tests.  
 317 This general pattern – that of diminished preferences in the presence of an informational  
 318 masker compared with quiet and the control masker – was consistent across all four choice

319 tests, as choice outcome did not depend on absolute pulse number ( $\chi^2 = 0.90$ ,  $p = 0.830$ ) or its  
320 interaction with masking condition ( $\chi^2 = 0.92$ ,  $p = 0.988$ ). Subjects were significantly less likely to  
321 choose longer calls over shorter calls in the informational masking condition compared with  
322 quiet (GEE:  $\beta = -1.50$ ,  $p = 0.011$ ; Fig. 5B) but not compared with the control masking condition  
323 (GEE:  $\beta = -0.46$ ,  $p = 0.454$ ; Fig. 5B); the probability of choosing the longer signal was not  
324 significantly different between quiet and the control masking condition (GEE:  $\beta = -1.04$ ,  $p =$   
325  $0.046$ ; Fig. 5B). It is worth noting that the sample sizes in these choice tests were small ( $\leq 12$  in  
326 most tests) due to the low rate of responding in the low-signal/high-masker configuration.

327 Response rates were higher in the high-signal/low-masker configuration (cf. Figs. 5A &  
328 6A) and depended on both masking condition ( $\chi^2 = 6.76$ ,  $p = 0.034$ ) and absolute pulse number  
329 ( $\chi^2 = 12.3$ ,  $p = 0.007$ ), but not their interaction ( $\chi^2 = 9.46$ ,  $p = 0.150$ ). Averaged across all four  
330 choice tests, the response rate in the high-signal/low-masker configuration was highest in quiet  
331 (80.0%, 92 of 115), lowest in the informational masking condition (67.3%, 76 of 113), and  
332 intermediate in the control masking condition (76.7%, 89 of 116). After controlling for the effects  
333 of absolute pulse number, response rate in the informational masking condition was significantly  
334 lower compared with quiet (GEE:  $\beta = -0.68$ ,  $p = 0.010$ ), but not compared with the control  
335 masking condition (GEE:  $\beta = -0.48$ ,  $p = 0.160$ ). Response rate did not differ between quiet and  
336 the control masking condition (GEE:  $\beta = 0.20$ ,  $p = 0.519$ ). After controlling for the effects of  
337 masking condition, subjects were less likely to respond (Fig. 5A) by making a choice in tests in  
338 which the shorter alternative had 8 pulses compared with those with shorter alternatives having  
339 16 pulses (GEE:  $\beta = -1.06$ ,  $p = 0.001$ ) but not 12 pulses (GEE:  $\beta = -0.48$ ,  $p = 0.097$ ) or 24  
340 pulses (GEE:  $\beta = -0.55$ ,  $p = 0.174$ ).

341 In the high-signal/low-masker configuration, the probability of choosing the longer call  
342 varied as a function of the absolute pulse numbers used in a given choice test ( $\chi^2 = 13.5$ ,  $p =$   
343  $0.004$ ). However, there was no clear pattern across tests: after controlling for differences in  
344 masking condition, subjects were less likely to choose the longer target signal (Fig. 5B) in tests  
345 in which the shorter alternative had 12 pulses compared with those with shorter alternatives  
346 having 8 pulses (GEE:  $\beta = -1.12$ ,  $p = 0.003$ ) or 24 pulses (GEE:  $\beta = -1.09$ ,  $p = 0.007$ ) but not 16  
347 pulses (GEE:  $\beta = -0.74$ ,  $p = 0.088$ ). There was no interaction between masking condition and  
348 absolute pulse number ( $\chi^2 = 2.94$ ,  $p = 0.820$ ). Among subjects that made a choice in this  
349 configuration (Fig. 6B), and after combining data across different choice tests, the ratio of  
350 choices favoring the longer alternative was highest in quiet (3.6:1), lowest in the informational  
351 masking condition (2.0:1), and intermediate in the control masking condition (3.0:1). However,  
352 after controlling for the effect of absolute pulse number, there were no significant differences in



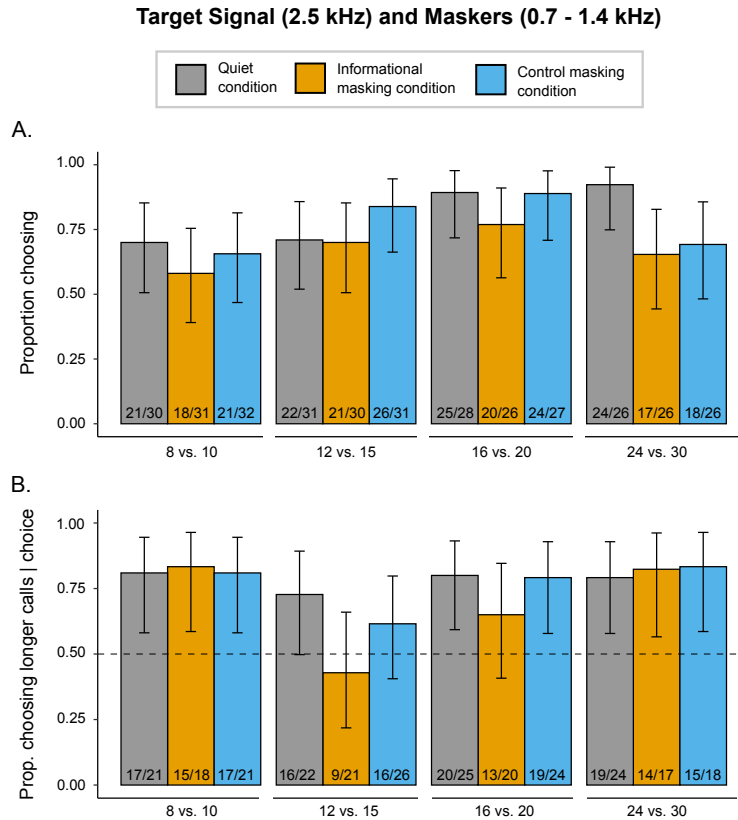

**Fig. 6: In Experiment 2, informational masking did not reduce response rates or impair pulse-number discrimination when target signals were presented in the BP range and maskers were presented in the AP range.** Gray, orange, and blue shaded regions depict the quiet, informational masking, and control masking conditions, respectively. (A) Response rates showing the proportions ( $\pm$  95% exact binomial confidence intervals) of subjects tested that chose between two alternating target signals differing in pulse number. The base of each bar shows the numbers of subjects choosing (numerator) and tested (denominator) in each condition. (B) Probability of choosing the longer call depicted by the proportions ( $\pm$  95% exact binomial confidence intervals) of subjects that chose the longer call over the shorter alternative. The base of each bar shows the numbers of subjects choosing the longer signal (numerator) and the total number that made a choice (denominator) in each condition.

353 the probability of choosing longer over shorter target signals between the informational masking  
 354 condition and quiet (GEE:  $\beta = -0.55$ ,  $p = 0.116$ ), between the informational masking and control  
 355 masking condition (GEE:  $\beta = -0.44$ ,  $p = 0.175$ ), or between the control masking condition and  
 356 quiet (GEE:  $\beta = -0.11$ ,  $p = 0.757$ ).

357

## 358 Discussion

359 Results from this study of a treefrog are consistent with the hypothesis that informational  
 360 masking can disrupt the processing of biologically informative features in the vocal signals of a  
 361 nonhuman animal. This outcome highlights informational masking as a general communication  
 362 problem shared by humans and other animals and suggests it may be a heretofore



363 unrecognized source of selection acting on animal communication systems. The present study,  
364 for example, confirms informational masking can disrupt acoustically guided choice of a mate,  
365 one of the most evolutionarily consequential choices many animals will ever make (Rosenthal,  
366 2017). In frogs, as in many other animals (Bee & Micheyl 2008), mate choice decisions depend  
367 on a female's ability, under noisy social conditions, to recognize and respond appropriately to  
368 the acoustic signals of a future mate based on correctly evaluating his signals, as well as  
369 discriminating between his signals and those of other courters. Phonotaxis toward a sound  
370 source constitutes behavioral evidence that a female frog has recognized a sound as that of an  
371 appropriate mate (Gerhardt 1995; Gerhardt & Huber 2002; Ryan & Rand 2001). In the low-  
372 signal/high-masker configuration, phonotaxis response rates were markedly reduced in the  
373 informational masking conditions compared with both quiet and the control masking conditions,  
374 which themselves did not differ. Moreover, this key result was robust: it was replicated across a  
375 12-dB range of SNRs and across both Experiment 1 (signal recognition; Fig. 3A) and  
376 Experiment 2 (signal discrimination; Fig. 5A). We interpret these findings as evidence that  
377 central mechanisms for recognizing and responding to temporally structured vocalizations were  
378 disrupted due to informational masking when other temporally structured sounds were present  
379 at remote frequencies. Consistent with this interpretation are the data from responsive subjects.  
380 Whenever statistically significant differences were observed, they were consistently in the  
381 direction of degraded performance – that is, elevated pulse number thresholds (Experiment 1,  
382 Fig. 3B) or reduced preference for longer calls (Experiment 2, Fig. 5B) – in the presence of the  
383 informational masker relative to quiet, the control masking condition, or both. However, our  
384 results also highlight two important features of informational masking in treefrogs: not all  
385 individuals were equally susceptible to informational masking, and informational masking was  
386 asymmetric between sounds transduced by the frog's two inner ear sensory papillae. We return  
387 to a discussion of these two features after considering the possible mechanistic basis of  
388 informational masking in treefrogs.

389 In humans, informational masking can occur when similarity between sounds of interest  
390 and other concurrent sounds leads to failures of auditory stream segregation or impairments of  
391 selective attention to audible and well segregated signals (Best et al., 2020; Ihlefeld and Shinn-  
392 Cunningham, 2008; Shinn-Cunningham, 2013). We believe a reduced ability to segregate target  
393 signals from informational maskers is unlikely to have contributed significantly to our results.  
394 Recall that the spectro-temporal relationships between the pulses of target signals and  
395 informational maskers – namely, wide frequency separation and a complete lack of temporal  
396 overlap – were specified to reduce energetic masking. These same spectro-temporal

397 relationships almost certainly promoted the segregation of signals and maskers into different  
398 auditory streams. Some of the most potent cues promoting the segregation of sounds into  
399 different auditory streams in humans and other animals are frequency separation, temporal  
400 incoherence (e.g., differences in onset times and patterns of amplitude modulation), and spatial  
401 separation (Bee, 2012; Dent et al., 2016; Dolležal et al., 2012; Lu et al., 2017; MacDougall-  
402 Shackleton et al., 1998; Micheyl et al., 2010; Middlebrooks & Onsan, 2012; Nie & Nelson, 2015;  
403 Oxenham, 2008; Shamma et al., 2013). Gray treefrogs are known to perceptually segregate  
404 overlapping sounds (e.g., call-like sounds) into different auditory streams based on frequency  
405 separation (Nityananda & Bee 2011), temporal incoherence (Gupta & Bee 2020), and spatial  
406 separation (Bee & Riemersma 2008; Schwartz & Gerhardt 1995; Schwartz & Del Monte 2019).  
407 Based on considerations of this earlier work, we suggest that the effects of informational  
408 masking observed here are unlikely due to a breakdown of auditory stream segregation, but  
409 instead reflect constraints on bottom-up attentional processing of biologically informative  
410 temporal features of signals.

411 Bottom-up attention involves stimulus-driven mechanisms in which information is  
412 processed involuntarily based on salient stimulus features (Katsuki & Constantinidis, 2014;  
413 Kaya & Elhilali, 2014). In Cope's gray treefrog, pulse rate is perhaps the most salient acoustic  
414 feature mediating recognition of, and responses to, conspecific calls (Bush et al. 2002; Schul &  
415 Bush, 2002; Gerhardt 2008; Tanner et al., 2017). Females respond to, and exhibit robust  
416 selective phonotaxis toward, advertisement calls with conspecific pulse rates but respond  
417 infrequently to calls with faster or slower pulse rates (e.g., Bush et al. 2002). Between the  
418 periphery and the midbrain, the processing of amplitude modulated (AM) sounds undergoes a  
419 transformation from synchronized spiking activity in auditory nerve fibers to highly selective AM  
420 tuning in the inferior colliculus (IC; also known as the torus semicircularis; Rose & Gooler 2007).  
421 Electrophysiological recordings of neurons in the IC of awake gray treefrogs show pulse-rate  
422 selectivity mirroring that observed in behavioral phonotaxis experiments with gravid females  
423 (Rose et al. 1985; 2015; Gupta et al. 2021). The vertebrate IC is a key auditory processing and  
424 audio-motor integration area thought to function in mediating acoustically guided behaviors with  
425 short latencies, such as responding to prey, predators, or conspecifics (Casseday & Covey,  
426 1996), including phonotaxis in female frogs (Endepols et al., 2003; Hoke et al., 2007, 2004).  
427 Small lesions of the gray treefrog IC nearly eliminate phonotaxis behavior (Endepols et al.  
428 2003). In stark contrast, even extensive lesions of the thalamus, a brain area implicated in top-  
429 down attention to acoustic signals in frogs (Endepols et al. 2003; Ponnath and Farris 2013), fail  
430 to eliminate selective phonotaxis based on differences in pulse rate (Endepols et al. 2003).

431 Together, these data suggest temporal information related to pulse rate is processed through  
432 bottom-up mechanisms that operate along the frog's ascending auditory pathway and that  
433 ultimately drive adaptive behavioral responses to biologically relevant signals.

434 We hypothesize that informational masking may have occurred in the present study due  
435 to the disruption of the precise, time-dependent integration of excitation and inhibition performed  
436 by a subclass of pulse-rate selective IC neurons known as interval-counting neurons. These  
437 neurons only fire after they are presented with a threshold number of pulses occurring at an  
438 optimal pulse rate that typically coincides with the species-specific pulse rate of advertisement  
439 calls (Edwards et al., 2002; Rose, 2014). In addition, the pulse number thresholds of interval-  
440 counting neurons closely match those measured behaviorally, indicating these neurons play a  
441 key functional role in processing biologically informative temporal features in pulsatile sounds  
442 (Gupta et al., 2021; Rose et al., 2015). Interval-counting neurons respond to the first pulse of a  
443 pulsatile sound with a brief excitatory postsynaptic potential (EPSP) followed by a large  
444 inhibitory postsynaptic potential (IPSP). Upon stimulation by subsequent pulses at the optimal  
445 pulse rate, excitation progressively overcomes inhibition, and action potentials are elicited  
446 following a threshold number of pulses. However, when a sound having a slower or faster pulse  
447 rate is presented, each pulse elicits an IPSP that disrupts the normal processes underlying  
448 interval counting (Edwards et al., 2007; Rose et al., 2011). Most neurons in the frog IC have V-  
449 shaped excitatory tuning functions that coincide with the tuning of one of the two inner ear  
450 papillae and that are encompassed by a broader range of inhibitory tuning (Hall, 1999). We  
451 speculate that an informational masker composed of slow-rate pulses in the range of the  
452 opposite inner ear papilla elicit additional inhibition in the form of masker-driven IPSPs that  
453 disrupt the precisely timed integration of excitation and inhibition underlying the interval counting  
454 process (Edwards et al. 2007; Rose et al. 2015), at least in some individuals and in a frequency-  
455 dependent manner.

456 One key outcome from this study is the documentation of considerable individual  
457 differences in susceptibility to informational masking. For example, in Experiment 1 (signal  
458 recognition), most subjects tested using the low-signal/high-masker configuration either failed to  
459 respond at all or they responded at pulse number thresholds and with response latencies that  
460 were similar to those of subjects tested in quiet. Studies of human subjects have also reported  
461 large individual variation in susceptibility to informational masking. Thresholds for detecting pure  
462 tones under informational masking conditions, for example, can vary by 20-30 dB and, in some  
463 extreme cases, up to 50 dB among human listeners (Lutfi et al., 2003; Neff and Dethlefs, 1995).  
464 Other studies have reported similarly large individual differences in speech recognition

465 thresholds in the presence of competing speech or speech-shaped noise (Swaminathan et al.,  
466 2015; Wightman et al., 2010; Zhang et al., 2021). Large individual differences among humans in  
467 susceptibility to informational masking have been attributed to several possible factors, including  
468 differences in sensory coding, neural processing, and attentional or cognitive strategies (Lutfi et  
469 al., 2003; Swaminathan et al., 2015). At present, the mechanisms responsible for individual  
470 differences in susceptibility to informational masking in frogs remain completely unknown.  
471 Compared with, for example, songbirds and mammals, vocal communication in frogs is not  
472 known for involving complex, top-down cognitive processing; thus, individual differences in  
473 sensory coding and low-level, bottom-up neural processing may be more likely explanations for  
474 individual differences in susceptibility to informational masking.

475         A second key outcome from this study was the demonstration of a stark asymmetry in  
476 informational masking related to the relative frequency relationships between target signals and  
477 maskers. Evidence of informational masking was most pronounced in the low-signal/high-  
478 masker condition, in which the signal was primarily transduced by the AP and the masker was  
479 transduced by the BP. At present, we lack a suitable mechanistic explanation for this  
480 asymmetry. Gray treefrogs can process temporal information related to pulse rate in sounds  
481 transduced in the inner ear by either the low-frequency (AP) or high-frequency (BP) peripheral  
482 channels (Gerhardt 2008; Bee, 2010; Nityananda & Bee, 2011, 2012). Although thresholds for  
483 responding to single-frequency target signals transduced by the two peripheral channels do not  
484 differ (Nityananda & Bee, 2012), there is nevertheless a frequency-dependent processing bias  
485 that favors signals transduced through one or the other peripheral channel. This bias varies  
486 across geographic populations and evolutionary lineages within the gray treefrog species  
487 complex (Gerhardt et al., 2007; Bee, 2010; Reichert & Höbel, 2017). In Minnesota, where this  
488 study was conducted, female phonotaxis is biased toward sounds transduced by the high-  
489 frequency (BP) peripheral channel (Bee 2010; Gupta & Bee unpublished data). It is tempting to  
490 speculate that a bias toward processing temporal information in the BP range is in some way  
491 responsible for the greater susceptibility to informational masking observed when the masker  
492 was in this frequency range. Such speculation, however, would seem to be at odds with  
493 previous work showing that target signals in the range of the BP are more, not less, susceptible  
494 to interference from distracting sounds compared with signals in the range of the AP, even when  
495 distractors are presented at 12-15 semitones away in frequency (Nityananda & Bee, 2011).  
496 Additional research will be needed to resolve this issue.

497         Results from this study significantly broaden current views on the effects of noise on  
498 animals. Studies of masking in the context of acoustic signaling typically focus (either explicitly

499 or implicitly) on energetic masking, even though informational masking is potentially more  
500 detrimental (Rosa & Koper, 2018). A few psychoacoustic studies have parsed informational  
501 from energetic masking in nonhuman animals (Branstetter et al., 2016; Cai and Dent, 2020;  
502 Eipert and Klump, 2020), and a few ecological studies have explored the idea that noise  
503 (primarily anthropogenic noise) acts as a distractor that causes animals to shift their attention  
504 away from behaviorally important tasks (Allen et al., 2021; Chan et al., 2010a; Chan et al.,  
505 2010b; Hubbard et al., 2015; Rochais et al., 2017). To the best of our knowledge, however, all  
506 such studies have evaluated the potential for informational masking outside the context of  
507 communication. By highlighting informational masking as a heretofore understudied source of  
508 potential selection on communication systems, this study opens several avenues for future  
509 research that could further advance our understanding of hearing and acoustic communication.  
510 Future studies, for example, should investigate the relative contributions of energetic and  
511 informational masking in imposing constraints on communicative interactions in animals that,  
512 like humans and frogs, frequently communicate in noisy social aggregations. It will be important  
513 to determine the extent to which energetic and informational masking impose similar or different  
514 constraints on communication and how those constraints independently and synergistically  
515 impact signal reception and decision making in noise. Given the recent and growing awareness  
516 of the negative effects of anthropogenic noise on animals (Barber et al. 2010; Rosa & Koper,  
517 2018; Slabbekoorn et al., 2018; Gomes et al. 2021), it seems clear that any impacts related to  
518 masking communication sounds should be examined through dual lenses of energetic and  
519 informational masking. Finally, because frogs are a well-established vertebrate model in  
520 research on vocal communication and auditory neuroethology (Gerhardt & Huber 2002; Narins  
521 et al. 2007), this study suggests future work on frogs could address the existing dearth of  
522 studies investigating the neural basis of informational masking at a cellular level in subcortical  
523 areas of the vertebrate brain (Snyder and Elhilali, 2017).

524

## 525 **Materials and Methods**

526

### 527 **Subjects**

528 Wild-caught gravid females of the western *H. chrysoscelis* lineage (Booker et al. 2022) were  
529 used as subjects for this study. All subjects were captured in amplexus at night (2200-0100 h)  
530 between mid-May and early July in 2018, 2019, and 2021 from wetlands at the Carver Park  
531 Reserve (Carver County, MN, USA), Richardson Nature Center (Hennepin County, MN, USA),  
532 and Tamarack Nature Center (Ramsey County, MN, USA). Previous studies of a congeneric

533 species (*Hyla gratiosa*) have established that gravid females captured in amplexus are as  
534 discriminating as those captured prior to choosing a mate (Murphy and Gerhardt, 1996). Pairs  
535 were collected in small plastic containers and returned to the laboratory on the St. Paul campus  
536 of the University of Minnesota, where phonotaxis experiments were conducted. Each pair was  
537 provided with aged tap water and maintained at approximately 4°C for up to 72 hours to delay  
538 oviposition. This is a common procedure used with temperate zone frogs that delays oviposition  
539 and extends a female's responsiveness in behavioral tests (Gerhardt, 1995). Approximately 30  
540 minutes before testing, pairs were transferred to a temperature-controlled incubator so that their  
541 body temperature could reach  $20 \pm 1^\circ\text{C}$ . All experiments were conducted at this temperature  
542 because female preferences are often temperature-dependent (Gerhardt, 1978), and 20°C is  
543 close to the average nighttime temperature at the local field sites during the gray treefrog  
544 breeding season (Ward et al., 2013a). Pairs were released at the site of their capture after the  
545 completion of testing. All animal procedures were approved by the University of Minnesota's  
546 Institutional Animal Care and Use Committee (1701-34456A and 2001-37746A) and adhered to  
547 the *Guidelines for the Treatment of Animals in Behavioural Research and Teaching*, jointly  
548 published by the Animal Behavior Society and the Association for the Study of Animal  
549 Behaviour.

550

### 551 **Acoustic Stimuli**

552 All signals and maskers were synthesized in MATLAB R2018a (Mathworks, Natick, MA, USA) at  
553 a sampling rate of 44.1 kHz (16 bit). Each target signal (Fig. 2A) was a pulse train consisting of  
554 between 1 and 30 identical, equally spaced pulses that were modeled after a typical pulse in  
555 natural advertisement calls recorded from our study populations (Fig. 1; Ward et al., 2013a).  
556 The carrier frequency of each pulse within a target signal was fixed at either 1.25 kHz ("low-  
557 signal"; AP range) or 2.5 kHz ("high-signal"; BP range), which are close to the average values of  
558 the two harmonically related spectral components present in natural calls (Ward et al., 2013a).  
559 Pulses within each target signal were shaped to have species typical rise and fall times (3.1-ms  
560 inverse exponential rise time; 5.4-ms exponential fall time) and were delivered at a rate of 50  
561 pulses/s (10-ms pulse duration, 20-ms pulse period, and 50% pulse duty cycle). During a  
562 phonotaxis test, each target signal was repeated at a rate of 11 signals/min, which  
563 approximates the average call rate in local populations (Ward et al. 2013a).

564 In the informational masking conditions (Fig. 2B), each masker consisted of a repeated  
565 sequence of 30 pulses produced at a rate of 25 pulses/s (10-ms pulse duration, 40-ms pulse  
566 period, and 25% pulse duty cycle). The temporal features of each pulse were identical to those



567 used in the target signal. The carrier frequency of each pulse in the informational masker was  
568 randomly chosen from among 13 frequencies spaced one semitone apart between 0.7 kHz and  
569 1.4 kHz (“low-masker”; AP range) or from 13 frequencies between 2.1 and 2.8 kHz (“high-  
570 masker”; BP range) having the same absolute spacing (in Hz) as the frequencies between 0.7  
571 kHz and 1.4 kHz. The pulses of the informational masker were interleaved with those of the  
572 target signal such that each masker pulse occurred precisely between consecutive pairs of  
573 signal pulses. In the control masking conditions (Fig. 2C), each masker consisted of an  
574 independently generated, band-limited noise having the same duration and bandwidth (0.7 kHz  
575 to 1.4 kHz or 2.1 kHz to 2.8 kHz) as the informational masker. In both masking conditions, a  
576 masker was gated on and off with each presentation of a target signal at a rate of 11  
577 maskers/min, and each presentation of a target signal was temporally centered in a masker.  
578 Each separate rendition of a masker was randomized in the sense that the frequency of its  
579 pulses (for the informational masker) or its temporal envelop (for the control masker) was  
580 determined randomly so that the same masker never repeated in the same test of a given  
581 subject. The sound pressure level (SPL re 20  $\mu$ Pa) of all maskers used in this study were  
582 calibrated to 75 dB (LC<sub>eq</sub>) at 1 m. This value falls within the range of background noise levels  
583 measured in gray treefrog choruses (Tanner & Bee, 2019).

584 It is important to note that the informational masking condition was designed to blend  
585 elements of classic experiments on informational masking in humans (e.g., the multitone  
586 masking paradigm; Neff & Green 1987; Kidd et al. 2008) with elements of biological realism  
587 pertinent to a female gray treefrog choosing a mate, such as a high degree of temporal overlap  
588 between the pulsatile calls of multiple individuals or species in a chorus (Schwartz et al. 2001;  
589 Nityananda & Bee 2011). A pulsatile informational masker was used because pulses (or trills)  
590 are common in animal vocalizations, including frog calls (Gerhardt & Huber 2002), and thus  
591 represent a natural sound for many animal species. The masker’s slower pulse rate (relative to  
592 the target signal) was chosen for three reasons: (1) several other frog species that breed  
593 syntopically with *H. chrysoscelis* produce calls with relatively slower pulse rates, thus rendering  
594 sounds with slower pulse rates biologically relevant in a mixed-species chorus environment  
595 (Bee et al. 2010; Howard & Young 1998; Gupta et al. 2021); (2) a pulse rate of 25 pulses/s is  
596 close to that of the eastern gray treefrog (*H. versicolor*), which often breeds in the same  
597 choruses with, and whose calls are generally unattractive to, females of *H. chrysoscelis* (Bush  
598 et al. 2002; Ward et al. 2013b); and (3) a pulse rate exactly half as fast as that of the target  
599 signal allowed us to temporally interleave signal and masker pulses, thereby reducing the  
600 potential for energetic masking. The frequency ranges selected for the informational maskers



601 coincide with frequencies present in the calls of other syntopically breeding frogs in mixed  
602 species choruses (Nityananda & Bee 2011). We randomized the frequency of the pulses within  
603 and between renditions of each masker to introduce an element of uncertainty into the testing  
604 paradigm, which has been shown in studies of humans to contribute to informational masking  
605 (Neff & Green 1987; Kidd et al. 2008).

606

### 607 **General Protocol**

608 We conducted experiments inside a circular phonotaxis arena (Fig. 7; 2-m diameter, 60-cm  
609 height) setup inside a custom-built, temperature-controlled ( $20 \pm 1^\circ\text{C}$ ), semi-anechoic chamber  
610 (length x width x height: 2.8 x 2.3 x 2.1 m; Industrial Acoustics Company, IAC, North Aurora, IL,  
611 USA). The chamber walls and ceiling were lined with dark gray acoustic absorber panels (IAC's  
612 Planarchoic™ system), and the floor was covered with dark gray, low-pile carpet. The arena  
613 itself was made from hardware cloth and covered with black fabric. On the floor outside the  
614 circular arena wall, we positioned two Mod1 Orb speakers (Orb Audio, Sherman Oaks, CA,  
615 USA) separated by an angle of  $90^\circ$ , with both speakers directed toward the center of the arena.  
616 Using this arena design and speaker placement allowed us to present acoustic stimuli to  
617 subjects who could not see the speakers.

618 Signals and maskers were broadcast using Adobe Audition 3.0 (Adobe Systems Inc.,  
619 San Jose, CA, USA) running on a Dell Optiplex 980 or 5050 PC (Dell Computer Corporation,  
620 Round Rock, TX, USA). We used a MOTU model 16A sound card (MOTU, Inc., Cambridge,  
621 MA, USA) interfaced with Crown XLS 1000 High-Density Power Amplifier (Crown International,  
622 Los Angeles, CA, USA) to broadcast sounds. Stimuli were calibrated to their target sound  
623 pressure levels (SPL; LCF, re  $20 \mu\text{Pa}$ ) by placing a Brüel and Kjær Type 4950 microphone  
624 connected to a Brüel and Kjær Type 2250-L sound level meter (Brüel and Kjær, Nærum,  
625 Denmark) 1 m away from the speaker at the approximate position of a subject's head at the  
626 release point. The frequency response of the playback system was  $\pm 2$  dB across the frequency  
627 range of interest (0.7 kHz to 2.8 kHz) when measured at this position.

628 At the beginning of a phonotaxis test, we separated the subject from her mate and  
629 placed her in a small acoustically transparent release cage (9-cm diameter, 2-cm height)  
630 located on the center of the arena floor. We allowed the subject to acclimate in the chamber for  
631 30 sec, after which we started the playback. At this time, we remotely lifted the lid of the release  
632 cage using a rope-and-pulley system and allowed the subjects to move freely in the arena. A  
633 test continued until the subject responded to a stimulus by entering a response zone consisting  
634 of a 10-cm semi-circle in front of a playback speaker or until the subject was considered to have

635 failed to respond to a stimulus. Our criteria for determining failure to respond were the following:  
636 (1) if the subject did not exit the release cage within 3 min; (2) if the subject did not enter a  
637 response zone within 5 minutes; (3) if the subject's first physical contact with the arena wall was  
638 in the semi-circle opposite the speaker in a single-stimulus test or in the quadrant opposite that  
639 formed by the two speakers in a choice test. Movements of subjects inside the arena were  
640 observed under infrared (IR) light (Tracksys, Ltd., Nottingham, UK) and scored in real-time by  
641 an observer outside the chamber by means of a video monitor.

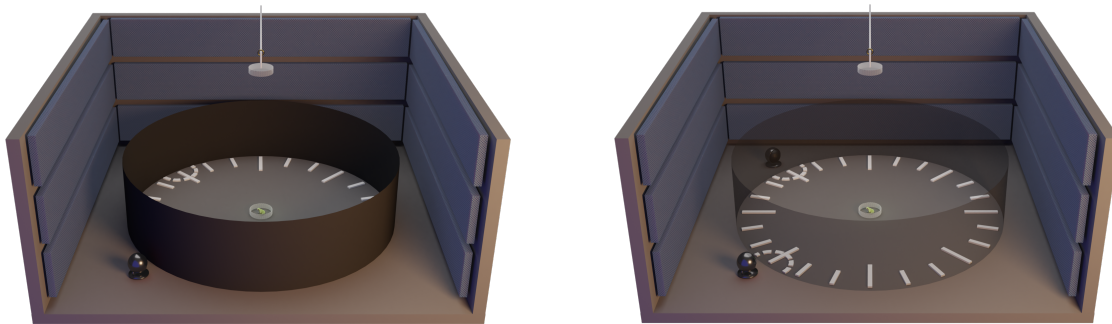

**Fig. 7: Schematic 3D diagram of the experimental setup.** Left panel depicts the circular phonotaxis arena inside a semi-anechoic chamber. Acoustic stimuli were broadcast from two speakers positioned on the floor outside the arena wall. In the right panel, the arena wall has been made visually transparent so that the two speakers and the marked response zones on the arena floor in front of the speakers are visible. At the center of the arena floor is a release cage in which subjects were placed at the start of each test.

642

### 643 **Experiment 1: Signal Recognition**

644 Experiment 1 tested the prediction that informational masking can impair signal recognition. We  
645 assessed signal recognition using a series of single-stimulus, no-choice tests (Gerhardt 1995;  
646 Ryan & Rand 2001) and an adaptive tracking procedure (Bee & Schwartz, 2009; Gupta et al.  
647 2021) to measure pulse number thresholds, which we operationally defined as the minimum  
648 number of pulses required to elicit positive phonotaxis. We measured two pulse number  
649 thresholds for each subject, one in quiet and one in a masking condition, with the order of  
650 threshold determination determined randomly. Subjects were assigned randomly to one of the  
651 two masking conditions (Fig. 2; informational masker or control masker), one of the two stimulus  
652 configurations (Fig. 2; low-signal/high-masker or high-signal/low-masker), and to one of three  
653 SNRs (-12 dB, -6 dB, or 0 dB). The amplitude of the masker was fixed at 75 dB SPL, and signal  
654 levels of 63, 69, and 75 dB SPL were used, respectively, to achieve nominal SNRs of -12 dB, -6  
655 dB, and 0 dB.

656           The first phonotaxis test of each subject was considered a “reference test” and consisted  
657 of broadcasting a sequence of attractive synthetic call having the average properties of  
658 conspecific (*H. chrysoscelis*) calls recorded in local populations (see Ward et al. 2013a). For  
659 females collected from ponds where the closely related and morphologically indistinguishable  
660 eastern gray treefrog (*Hyla versicolor*) were also breeding, we alternated broadcasts of this  
661 conspecific call with broadcasts of synthetic *H. versicolor* calls. Signals were calibrated to 85 dB  
662 SPL in reference tests. Gravid females exhibit robust selective phonotaxis toward synthetically-  
663 generated conspecific calls (Gerhardt, 1994; Gerhardt & Doherty, 1988; Bee 2008; Gall et al.  
664 2019); therefore, this initial reference test allowed us to confirm both a female’s species identity  
665 (if necessary) and its motivation to respond in phonotaxis tests. Only responsive females  
666 identified as *H. chrysoscelis* were used as subjects in subsequent tests.

667           We followed procedures described by Gupta et al. (2021) to measure pulse number  
668 thresholds from 323 subjects. In the first of a sequence of single-speaker tests, we presented  
669 subjects with a sequence of target signals consisting of 8 pulses. Depending on whether the  
670 subject responded to the target signal, we either decreased or increased the number of pulses  
671 in the target signal by two pulses in the subsequent test. If the subject responded to the  
672 sequence of 8-pulse target signal on this test, they heard a sequence of 6-pulse signals in their  
673 next test; subjects that failed to respond to the 8-pulse target signal heard a sequence of 10-  
674 pulse target signals in their next test. This process continued until the subject’s response  
675 changed from a response to a no response or from no response to a response between two  
676 consecutive tests. After this change in behavior, we performed a final test in which we reversed  
677 the direction of change and either increased or decreased the pulse number by one pulse based  
678 on whether it responded to the target signal in the immediately preceding test. The pulse  
679 number threshold was calculated by averaging the lowest pulse number that elicited a response  
680 and the highest pulse number that did not. The maximum number of pulses used in any target  
681 signal was 20 pulses. If the subject did not respond to a target signal with 20 pulses, we did not  
682 determine its pulse number threshold. As already noted, this maximum value was chosen  
683 because it exceeds the minimum number of pulses per call (12 pulses; Ward et al., 2013a) and  
684 the maximum pulse number threshold in response to target signals with both spectral peaks (16  
685 pulses; Gupta et al. 2021). In addition, restricting the maximum number of pulses to 20 was  
686 necessary to ensure we could measure two pulse number thresholds per subject, which  
687 typically do not respond in more than about 15 to 20 phonotaxis tests before losing response  
688 motivation. Response latencies were recorded for all tests in which the subject responded to a  
689 target signal. After determining a subject’s first pulse number threshold we immediately

690 restarted the adaptive tracking procedure to determine their second threshold. In addition, we  
691 determined the latency to respond to each target signal having the lowest number of pulses that  
692 elicited a response. If at any time during testing, a subject failed to respond in three consecutive  
693 tests, we performed another reference test. Only subjects that exhibited positive phonotaxis in  
694 this reference test were tested further; two subjects were excluded from the final dataset  
695 because they did not meet this inclusion criterion. Procedures for determining pulse number  
696 thresholds in quiet and in the two masking conditions were the same with the following  
697 exception. In the masking condition, subjects experienced a “sham” test prior to commencing  
698 the adaptive tracking procedure to determine their masked pulse number threshold. In this  
699 sham condition, the masker was presented alone without the target signal. Responses to the  
700 masker were not entirely unexpected given that some gravid females will, in the absence of a  
701 target signal with conspecific call properties, respond to other types of sounds with the  
702 appropriate spectral content, including bandlimited noise (Bee and Swanson, 2007; Vélez et al.  
703 2017), unmodulated tones (Kuczynski et al. 2010), and signals with slower or faster pulse rate  
704 typical of a heterospecific male (Gerhardt, 2001; Gerhardt and Doherty, 1988). It was, therefore,  
705 desirable to exclude highly motivated subjects that responded to maskers to obtain accurate  
706 pulse number thresholds using the adaptive tracking procedure. We excluded 46 subjects from  
707 determination of a pulse number threshold because they responded to the masker in the  
708 relevant sham condition; 43 of 186 subjects (23.1%) tested in the low-signal/high-masker  
709 configuration responded to the high-masker sham and 3 of 135 subjects (2.2%) tested in the  
710 high-signal/low-masker configuration responded to the low-masker sham. Our final sample size  
711 in Experiment 1 was 275 subjects.

712 We measured response rate by coding each subject’s response in quiet or a masking  
713 condition as binary. If a subject’s pulse number threshold was 20 or fewer pulses in a particular  
714 condition, it was assigned a response score of 1. Otherwise, it was assigned a score of 0. We  
715 used generalized estimating equations (GEE) with logit link functions and exchangeable  
716 correlations to analyze this binary response variable. GEE is an extension of the generalized  
717 linear model (GLM) that takes into account correlated measurements within a dataset. But  
718 unlike GLMM, which produces estimates that are conditional on random effects, GEE is a better  
719 alternative for producing estimates that are averaged over random effects (Hubbard et al.,  
720 2010). An initial inspection of the data revealed large effects of stimulus configuration, which we  
721 confirmed by comparing two GEE models with and without stimulus configuration as a predictor  
722 variable for each of the three response variables — response rate, pulse number threshold, and  
723 response latency (see Results section). Because these effects were of secondary interest, we

724 separately analyzed the effects of masking condition and SNR in the two configurations. For  
725 analyses of response rate in the low-signal/high-masker configuration, the initial GEE model  
726 included masking condition (quiet, informational masking, and control masking), SNR (-12 dB, -  
727 6 dB, and 0 dB), and the masking condition  $\times$  SNR interaction as predictor variables. Subject ID  
728 was used for clustering to account for repeated measures. We fitted a second GEE model in  
729 which we excluded the masking condition  $\times$  SNR interaction. We compared the two models  
730 using ANOVA and found that they were not statistically different. We fitted a third GEE model in  
731 which we additionally excluded SNR as a predictor variable and compared this model with the  
732 second model using ANOVA and found that they also were not statistically different. Using a  
733 similar model comparison method, we investigated whether the order in which thresholds were  
734 determined had any bearing on the outcome. For analyses of response rate in the high-  
735 signal/low-masker configuration, we could not fit GEE models because the response rate of  
736 subjects in the control masking condition was 100%. The lack of variance in the data led to the  
737 problem of complete separation, producing spurious results for the main effects model. To  
738 compare any two models using ANOVA, we used  $\alpha = 0.05$  for hypothesis testing. But to test  
739 differences between the three treatment conditions (quiet vs. informational masking, quiet vs.  
740 control masking, and informational masking vs. control masking), we used Wald statistics and  
741 the Holm-Šydák correction for multiple comparisons.

742 We determined pulse number thresholds and response latencies for each subject that  
743 responded in both quiet and in the presence of their assigned masker. Subjects that did not  
744 respond to target signals with 20 or fewer pulses in either quiet or in the presence of the masker  
745 were excluded from this analysis (N = 50). This paired data allowed us to evaluate how the  
746 presence of each masker influenced phonotaxis behavior relative to quiet in the same group of  
747 subjects. To make pairwise comparisons, we used two separate paired-sample Wilcoxon tests  
748 at each SNR to compare separately the pulse number thresholds and response latencies in  
749 quiet and the paired condition with a masker. Because these data were not normally distributed  
750 and could not be successfully transformed to follow a normal distribution, a non-parametric  
751 version of paired t-test was used for hypothesis testing. An independent sample Wilcoxon test  
752 was used to compare the pulse number thresholds and response latencies between subjects  
753 that responded in the informational masking and control masking conditions at each SNR. In  
754 this set of analyses also, we used the Holm-Šydák correction for multiple comparisons.

755

## 756 **Experiment 2: Signal Discrimination**



757 Experiment 2 tested the prediction that informational masking can impair signal discrimination.  
758 We assessed signal discrimination using a series of two-alternative choice tests (Gerhardt 1995;  
759 Ryan & Rand 2001) to measure the preferences of female *H. chrysoscelis* for longer calls with  
760 more pulses. To create a choice scenario for subjects, different target signals were broadcast  
761 from the two speakers separated by 90° around the test arena. These signals alternated in time  
762 such that there were equal intervals of silence preceding and following each presentation. All  
763 subjects were initially tested with a reference test in which we presented a choice between  
764 synthetic *H. chrysoscelis* and *H. versicolor* calls. Only subjects that selectively responded to the  
765 *H. chrysoscelis* call were tested further. As in Experiment 1, separate groups of subjects were  
766 tested in the two stimulus configurations (Fig. 2). Within each configuration, subjects were given  
767 a choice between a shorter target signal (with 8, 12, 16 pulses, or 24 pulses) and a longer target  
768 signal having 25% more pulses (10, 15, 20, and 30 pulses, respectively). Tests of 8 versus 10,  
769 12 versus 15, and 16 versus 20 were performed within subjects and replicated within subjects in  
770 each masking condition (quiet, informational masker, control masker); a separate group of  
771 subjects was tested with 24 versus 30 in all three masking conditions. The order of tests was  
772 randomized for each subject. We scored a response when the subject made a choice by  
773 entering the response zone in front of one of the two speakers, and we noted its choice as being  
774 for either the longer or shorter signal. We used the criteria from Experiment 1 to determine when  
775 no response had occurred. Also as in Experiment 1, we performed a reference test after three  
776 consecutive no responses to confirm females were still motivated to respond. Subjects that lost  
777 motivation during testing (7 of 111) were not tested further, but we included their data from all  
778 tests that were completed before they exhibited their last response. To prevent side bias, we  
779 randomized which speaker broadcast the shorter target signal. The shorter signal was always  
780 the signal that started the alternating sequence of two target signals. To determine whether  
781 females were significantly biased toward the first sound they heard, we performed a control  
782 experiment in which we gave 20 subjects an additional choice between two identical versions of  
783 the synthetic *H. chrysoscelis* calls used in reference tests; 12 of 20 subjects chose the speaker  
784 that broadcast the first signal in the alternating sequence (two-tailed binomial test:  $p = 0.503$ ).  
785 The sound pressure levels of all target signals and maskers used in the pulse-number  
786 discrimination tests were calibrated to 69 dB SPL and 75 dB SPL, respectively, to create a  
787 nominal SNR of -6 dB; signals were calibrated to 85 dB SPL in references tests.

788 We measured response rate by coding each subject's response as binary: made a  
789 choice (1) or did not make a choice (0). For the subset of subjects that responded in each  
790 choice test, we also scored their choice as binary: longer signal (1) or shorter signal (0). As in

791 Experiment 1, we fitted two GEE models with and without stimulus configuration as a predictor  
792 variable. Again, stimulus configuration had a significant effect; therefore we used separate GEE  
793 models for each stimulus configuration to analyze response rate and the probability of choosing  
794 the longer call. Each model was fitted using a logit link function and exchangeable correlation  
795 structure. The first model included masking condition (quiet, informational masker, or control  
796 masker), the number of pulses in the shorter signal (“absolute pulse number”: 8, 12, 16, or 24  
797 pulses), and the masking condition × absolute pulse number interaction as predictor variables.  
798 We compared this model with a second model in which we excluded the interaction term. In  
799 both stimulus configurations, we did not find any statistical difference between the two models.  
800 We fitted a third model in which we additionally excluded absolute pulse number as a predictor  
801 variable and compared the second and the third model. If absolute pulse number had a  
802 significant effect on the outcome, we adopted the second model. Otherwise, we adopted the  
803 third model with masking condition as the only predictor variable. We again used Wald statistics  
804 and the Holm-Šydák correction for multiple comparisons to compare the outcomes across the  
805 three masking conditions.

806

### 807 **Acknowledgments**

808 We would like to thank Paloma Gonzales-Bellido, Lata Kalra, Katie Krueger, Annika Rupert, and  
809 Emilie Snell-Rood for feedback on the manuscript; Andrew Oxenham for insightful about  
810 informational masking; Mridul Yadav for making the 3D schematic of the phonotaxis arena; all  
811 members of the Bee Lab 2018-2021 for help with collecting frogs; the Minnesota Department of  
812 Natural Resources for permission to collect frogs; and Three Rivers Park District and the  
813 Ramsey County Department of Parks and Recreation for after-hour access to field sites.

814

### 815 **Competing interests**

816 No competing interests declared

817

### 818 **References**

819 Allen LC, Hristov NI, Rubin JJ, Lightsey JT, Barber JR. 2021. Noise distracts foraging bats. *Proc*  
820 *R Soc B*, 288(1944). doi:10.1098/rspb.2020.2689

821

822 Amiri M, Jarollahi F. 2020. An overview on informational masking. *Aud Vestib Res* 29(3):128–  
823 139. doi:10.1145/382286.382381

824

825 Aubin T, Jouventin P. 1998. Cocktailparty effect in king penguin colonies. *Proc R Soc London*  
826 *Ser B Biol Sci* 265:1665–1673. doi:10.1098/RSPB.1998.0486

827



- 828 Barber JR, Crooks KR, Fristrup KM. 2010. The costs of chronic noise exposure for terrestrial  
829 organisms. *Trends Ecol Evol* 25:180–189. doi:10.1016/J.TREE.2009.08.002  
830
- 831 Bee MA. 2015. Treefrogs as animal models for research on auditory scene analysis and the  
832 cocktail party problem. *Int J Psychophysiol* 95:216–237.  
833 doi:10.1016/j.ijpsycho.2014.01.004  
834
- 835 Bee MA. 2012. Sound source perception in anuran amphibians. *Curr Opin Neurobiol* 22:301–  
836 310. doi:10.1016/j.conb.2011.12.014  
837
- 838 Bee MA. 2010. Spectral preferences and the role of spatial coherence in simultaneous  
839 integration in gray treefrogs (*Hyla chrysoscelis*). *J Comp Psychol* 124:412–24.  
840 <https://doi.org/10.1037/a0020307>  
841
- 842 Bee MA. 2008. Parallel female preferences for call duration in a diploid ancestor of an  
843 allotetraploid treefrog. *Anim Behav* 76:845–853. doi:10.1016/j.anbehav.2008.01.029  
844
- 845 Bee MA, Christensen-Dalsgaard J. 2016. Sound source localization and segregation with  
846 internally coupled ears: the treefrog model. *Biol Cybern* 110:271–290. doi:10.1007/s00422-  
847 016-0695-5  
848
- 849 Bee MA, Micheyl C. 2008. The “cocktail party problem”; what is it? How can it be solved? And  
850 why should animal behaviorist study it? *J Comp Psychol* 122:235–251. doi:10.1037/0735-  
851 7036.122.3.235.  
852
- 853 Bee MA, Riemersma KK. 2008. Does common spatial origin promote the auditory grouping of  
854 temporally separated signal elements in grey treefrogs? *Anim Behav* 76:831–843.  
855 <https://doi.org/10.1016/j.anbehav.2008.01.026>  
856
- 857 Bee MA, Schwartz JJ. 2009. Behavioral measures of signal recognition thresholds in frogs in  
858 the presence and absence of chorus-shaped noise. *J Acoust Soc Am* 126:2788–2801.  
859 doi:10.1121/1.3224707  
860
- 861 Bee MA, Swanson EM. 2007. Auditory masking of anuran advertisement calls by road traffic  
862 noise. *Anim Behav* 74:1765–1776. <https://doi.org/10.1016/j.anbehav.2007.03.019>  
863
- 864 Bent AM, Ings TC, Mowles SL. 2021. Anthropogenic noise disrupts mate choice behaviors in  
865 female *Gryllus bimaculatus*. *Behav Ecol* 32:201–210. doi:10.1093/beheco/araa124  
866
- 867 Best V, Conroy C, Kidd G. 2020. Can background noise increase the informational masking in a  
868 speech mixture? *J Acoust Soc Am* 147:144. doi:10.1121/10.0000719  
869
- 870 Booker WW, Gerhardt HC, Lemmon AR, et al. 2022. The complex history of genome duplication  
871 and hybridization in North American gray treefrogs. *Mol Biol Evol* 39:.  
872 <https://doi.org/10.1093/MOLBEV/MSAB316>  
873
- 874 Branstetter BK, Bakhtiari K, Black A, Trickey JS, Finneran JJ, Aihara H. 2016. Energetic and  
875 informational masking of complex sounds by a bottlenose dolphin (*Tursiops truncatus*). *J*  
876 *Acoust Soc Am* 140:1904–1917. doi:10.1121/1.4962530  
877
- 878 Bregman AS. 1990. Auditory scene analysis: the perceptual organization of sound. MIT Press,

- 879 Cambridge.  
880  
881 Bronkhorst AW. 2015. The cocktail-party problem revisited: early processing and selection of  
882 multi-talker speech. *Attention, Perception, Psychophys* 77:1465–1487.  
883 doi:10.3758/S13414-015-0882-9  
884  
885 Brumm H. 2013. Animal communication and noise. Springer Science and Business Media.  
886  
887 Brumm H, Slabbekoorn H. 2005. Acoustic Communication in Noise. *Adv Study Behav*.  
888 doi:10.1016/S0065-3454(05)35004-2  
889  
890 Brungart DS, Chang PS, Simpson BD, Wang D. 2006. Isolating the energetic component of  
891 speech-on-speech masking with ideal time-frequency segregation. *J Acoust Soc Am*  
892 120:4007–4018. doi:10.1121/1.2363929  
893  
894 Bush SL, Gerhardt HC, Schul J. 2002. Pattern recognition and call preferences in treefrogs  
895 (Anura: Hylidae): a quantitative analysis using a no-choice paradigm. *Anim Behav* 63:7–14.  
896 doi:10.1006/anbe.2001.1880  
897  
898 Cai H, Dent ML. 2020. Attention capture in birds performing an auditory streaming task. *PLoS*  
899 *One* 15:e0235420. doi:10.1371/journal.pone.0235420  
900  
901 Carlile S, Corkhill C. 2015. Selective spatial attention modulates bottom-up informational  
902 masking of speech. *Sci Rep* 5. doi:10.1038/srep08662  
903  
904 Casseday JH, Covey E. 1996. A neuroethological theory of the operation of the inferior  
905 colliculus; pp. 311–322. *Brain Behav Evol* 47:311–322. <https://doi.org/10.1159/000113249>  
906  
907 Chan AAYH, David Stahlman W, Garlick D, Fast CD, Blumstein DT, Blaisdell AP. 2010a.  
908 Increased amplitude and duration of acoustic stimuli enhance distraction. *Anim Behav*  
909 80:1075–1079. doi:10.1016/j.anbehav.2010.09.025  
910  
911 Chan AAYH, Giraldo-Perez P, Smith S, Blumstein DT. 2010b. Anthropogenic noise affects risk  
912 assessment and attention: the distracted prey hypothesis. *Biol Lett* 6:458–461.  
913 doi:10.1098/rsbl.2009.1081  
914  
915 Dent ML, Martin AK, Flaherty MM, Neilans EG. 2016. Cues for auditory stream segregation of  
916 birdsong in budgerigars and zebra finches: effects of location, timing, amplitude, and  
917 frequency. *J Acoust Soc Am* 139:674–683. <https://doi.org/10.1121/1.4941322>  
918  
919 Dimitrijevic A, Smith ML, Kadis DS, Moore DR. 2019. Neural indices of listening effort in noisy  
920 environments. *Sci Rep* 9:11278. doi:10.1038/s41598-019-47643-1  
921  
922 Dolležal L-V, Beutelmann R, Klump GM. 2012. Stream segregation in the perception of  
923 sinusoidally amplitude-modulated tones. *PLoS One* 7:e43615.  
924 doi:10.1371/JOURNAL.PONE.0043615  
925  
926 Dooling RJ, Lohr B, Dent ML. 2000. Hearing in Birds and Reptiles. pp. 308–359.  
927 doi:10.1007/978-1-4612-1182-2\_7  
928  
929 Durlach NI, Mason CR, Kidd G, Arbogast TL, Colburn HS, Shinn-Cunningham BG. 2003. Note

- 930 on informational masking. *J Acoust Soc Am* 113:2984–2987. doi:10.1121/1.1570435  
931
- 932 Edwards CJ, Alder TB, Rose GJ (2002) Auditory midbrain neurons that count. *Nat Neurosci*  
933 5:934–936. <https://doi.org/10.1038/nn916>  
934
- 935 Edwards CJ, Leary CJ, Rose GJ (2007) Counting on inhibition and rate-dependent excitation in  
936 the auditory system. *J Neurosci* 27:13384–13392.  
937
- 938 Eipert L, Klump GM. 2020. Uncertainty-based informational masking in a vowel discrimination  
939 task for young and old Mongolian gerbils. *Hear Res* 392:107959.  
940 doi:10.1016/J.HEARES.2020.107959  
941
- 942 Endepols H, Feng AS, Gerhardt HC, Schul J, Walkowiak W. 2003. Roles of the auditory  
943 midbrain and thalamus in selective phonotaxis in female gray treefrogs (*Hyla versicolor*).  
944 *Behav Brain Res* 145:63–77. doi:10.1016/S0166-4328(03)00098-6  
945
- 946 Erbe C, Reichmuth C, Cunningham K, Lucke K, Dooling R. 2016. Communication masking in  
947 marine mammals: a review and research strategy. *Mar Pollut Bull* 103:15–38.  
948 doi:10.1016/J.MARPOLBUL.2015.12.007  
949
- 950 Feng AS, Narins PM, Xu CH, et al. 2006. Ultrasonic communication in frogs. *Nature* 440:333–  
951 336. <https://doi.org/10.1038/nature04416>  
952
- 953 Freyman RL, Helfer KS, Balakrishnan U. 2001. Spatial and spectral factors in release from  
954 informational masking in speech recognition. *Acoust Soc Am* 109. doi:10.1121/1.1354984  
955
- 956 Gall MD, Bee MA, Baugh AT. 2019. The difference a day makes: breeding remodels hearing,  
957 hormones and behavior in female Cope’s gray treefrogs (*Hyla chrysoscelis*). *Horm Behav*  
958 108:62–72. <https://doi.org/10.1016/j.yhbeh.2019.01.001>  
959
- 960 Gerhardt HC. 2001. Acoustic communication in two groups of closely related treefrogs. *Adv*  
961 *Study Behav* 30:99–167. doi:10.1016/s0065-3454(01)80006-1  
962
- 963 Gerhardt HC. 1995. Phonotaxis in female frogs and toads: execution and design of experiments  
964 In: Klump GM, Dooling RJ, Fay RR, Stebbins WC, editors. *Methods in Comparative*  
965 *Psychoacoustics*. Basel: Birkhäuser Basel. pp. 209–220. doi:10.1007/978-3-0348-7463-  
966 2\_18  
967
- 968 Gerhardt HC. 1994. Reproductive character displacement of female mate choice in the grey  
969 treefrog, *Hyla chrysoscelis*. *Anim Behav* 47:959–969. doi:10.1006/anbe.1994.1127  
970
- 971 Gerhardt HC. 1978. Temperature coupling in the vocal communication system of the treefrog,  
972 *Hyla versicolor*. *Science (80-)* 199:992–994. doi:10.1121/1.2016435  
973
- 974 Gerhardt HC. 1975. Sound pressure levels and radiation patterns of the vocalizations of some  
975 North American frogs and toads, *J. comp. Physiol* 102:1–12  
976
- 977 Gerhardt HC. 2008. Phonotactic selectivity in two cryptic species of gray treefrogs: Effects of  
978 differences in pulse rate, carrier frequency and playback level. *J Exp Biol* 211:2609–2616.  
979 <https://doi.org/10.1242/jeb.019612>  
980

- 981 Gerhardt HC, Doherty JA. 1988. Acoustic communication in the gray treefrog, *Hyla versicolor*:  
982 evolutionary and neurobiological implications. *J Comp Physiol A* 162:261–278.  
983 doi:10.1007/BF00606090  
984
- 985 Gerhardt HC, Huber F. 2002. Acoustic communication in insects and anurans : common  
986 problems and diverse solutions. Chicago: University of Chicago Press.  
987
- 988 Gerhardt HC, Martínez-Rivera CC, Schwartz JJ, et al. 2007. Preferences based on spectral  
989 differences in acoustic signals in four species of treefrogs (Anura: Hylidae). *J Exp Biol*  
990 210:2990–2998. <https://doi.org/10.1242/jeb.006312>  
991
- 992 Gomes DGE, Francis CD, Barber JR. 2021. Using the past to understand the present: coping  
993 with natural and anthropogenic noise. *Bioscience* 71:223–234  
994
- 995 Gupta S, Bee MA. 2020. Treefrogs exploit temporal coherence to form perceptual objects of  
996 communication signals. *Biol Lett* 16:20200573. <https://doi.org/10.1098/rsbl.2020.0573>  
997
- 998 Gupta S, Alluri RK, Rose GJ, Bee MA. 2021. Neural basis of acoustic species recognition in a  
999 cryptic species complex. *J Exp Biol*. doi:10.1242/JEB.243405  
1000
- 1001 Gurule-Small GA, Tinghitella RM. 2018. Developmental experience with anthropogenic noise  
1002 hinders adult mate location in an acoustically signalling invertebrate. *Biol Lett* 14.  
1003 doi:10.1098/RSBL.2017.0714  
1004
- 1005 Gutschalk A, Micheyl C, Oxenham AJ. 2008. Neural correlates of auditory perceptual  
1006 awareness under informational masking. *PLoS One* 6. doi:10.1371/journal  
1007
- 1008 Hage SR, Jiang T, Berquist SW, et al. 2013. Ambient noise induces independent shifts in call  
1009 frequency and amplitude within the Lombard effect in echolocating bats. *Proc Natl Acad*  
1010 *Sci* 110:4063–4068. <https://doi.org/10.1073/pnas.1211533110>  
1011
- 1012 Hall JC (1994) Central processing of communication sounds in the anuran auditory system.  
1013 *Integr Comp Biol* 34:670–684. <https://doi.org/10.1093/icb/34.6.670>  
1014
- 1015 Hillery CM. 1984. Detection of amplitude-modulated tones by frogs: processing mechanisms,  
1016 *Hearing Research* 14:129–143.  
1017
- 1018 Hillery CM, Fay RR (1982) Forward masking and suppression in the midbrain of the southern  
1019 grey treefrog (*Hyla chrysoscelis*). *J Comp Physiol A* 146:435–447.  
1020 <https://doi.org/10.1007/BF00609440>  
1021
- 1022 Hoke KL, Burmeister SS, Fernald RD, Rand AS, Ryan MJ, Wilczynski W. 2004. Functional  
1023 mapping of the auditory midbrain during mate call reception. *J Neurosci* 24:11264–11272.  
1024 doi:10.1523/JNEUROSCI.2079-04.2004  
1025
- 1026 Hoke KL, Ryan MJ, Wilczynski W. 2007. Integration of sensory and motor processing underlying  
1027 social behaviour in túngara frogs. *Proc R Soc B Biol Sci* 274:641–649.  
1028 doi:10.1098/rspb.2006.0038  
1029
- 1030 Hotchkiss C, Parks S. 2013. The lombard effect and other noise-induced vocal modifications:  
1031 Insight from mammalian communication systems. *Biol Rev* 88:809–824.

- 1032 <https://doi.org/10.1111/brv.12026>  
1033  
1034 Howard RD, Young JR. 1998. Individual variation in male vocal traits and female mating  
1035 preferences in *Bufo americanus*. *Anim Behav* 55:1165–1179.  
1036 <https://doi.org/10.1006/ANBE.1997.0683>  
1037  
1038 Hubbard AE, Ahern J, Fleischer NL, Laan M Van Der, Lippman SA, Jewell N, Bruckner T,  
1039 Satariano WA. 2010. To GEE or not to GEE: Comparing population average and mixed  
1040 models for estimating the associations between neighborhood risk factors and health.  
1041 *Epidemiology*. doi:10.1097/EDE.0b013e3181caeb90  
1042  
1043 Hubbard L, King W, Vu A, Blumstein DT. 2015. Heterospecific nonalarm vocalizations enhance  
1044 risk assessment in common mynas. *Behav Ecol* 26:632–638. doi:10.1093/beheco/arv002  
1045  
1046 Hulse SH. 2002. Auditory scene analysis in animal communication. *Adv Study Behav* 31:163–  
1047 200. doi:10.1016/s0065-3454(02)80008-0  
1048  
1049 Ihlefeld A, Shinn-Cunningham B. 2008. Spatial release from energetic and informational  
1050 masking in a selective speech identification task. *J Acoust Soc Am* 123:4369–4379.  
1051 doi:10.1121/1.2904826  
1052  
1053 Katsuki F, Constantinidis C. 2014. Bottom-up and top-down attention: Different processes and  
1054 overlapping neural systems. *Neuroscientist* 20:509–521.  
1055 <https://doi.org/10.1177/1073858413514136>  
1056  
1057 Kaya EM, Elhilali M. 2014. Investigating bottom-up auditory attention. *Front Hum Neurosci*  
1058 0:327. doi:10.3389/FNHUM.2014.00327  
1059  
1060 Kidd G. 1994. Reducing informational masking by sound segregation. *J Acoust Soc Am*  
1061 95:3475. doi:10.1121/1.410023  
1062  
1063 Kidd GJ, Mason CR, Richards VM, Gallun FJ, Durlach NI. 2008. Informational masking. *Audit*  
1064 *Percept Sound Sources*, Springer, Boston, MA 143–189. doi:10.1007/978-0-387-71305-2  
1065  
1066 Klatte M, Bergström K, Lachmann T. 2013. Does noise affect learning? A short review on noise  
1067 effects on cognitive performance in children. *Front Psychol* 4:578.  
1068 doi:10.3389/fpsyg.2013.00578  
1069  
1070 Klump GM. 1996. Bird communication in the noisy world. *Ecology and evolution of acoustic*  
1071 *communication in birds* 321,388.  
1072  
1073 Kuczynski MC, Vélez A, Schwartz JJ, Bee MA. 2010. Sound transmission and the recognition of  
1074 temporally degraded sexual advertisement signals in Cope's gray treefrog (*Hyla*  
1075 *chrysoscelis*). *J Exp Biol* 213:2840–2850. doi:10.1242/jeb.044628  
1076  
1077 Lee N, Christensen-Dalsgaard J, White LA, et al. 2021. Lung mediated auditory contrast  
1078 enhancement improves the Signal-to-noise ratio for communication in frogs. *Curr Biol*  
1079 31:1488-1498.e4. <https://doi.org/10.1016/j.cub.2021.01.048>  
1080  
1081 Lee N, Mason AC. 2017. How spatial release from masking may fail to function in a highly  
1082 directional auditory system. *Elife* 6. doi:10.7554/eLife.20731



- 1083  
1084 Lee N, Ward JL, Vélez A, Micheyl C, Bee MA. 2017. Frogs Exploit Statistical Regularities in  
1085 Noisy Acoustic Scenes to Solve Cocktail-Party-like Problems. *Curr Biol* 27:743–750.  
1086 doi:10.1016/j.cub.2017.01.031  
1087  
1088 Lewis ER, Narins PM. 1999. The Acoustic Periphery of Amphibians: Anatomy and Physiology.  
1089 *Comp Hear Fish Amphib* 4:101–154. doi:10.1007/978-1-4612-0533-3\_4  
1090  
1091 Lidestam B, Holgersson J, Moradi S. 2014. Comparison of informational vs. energetic masking  
1092 effects on speechreading performance. *Front Psychol* 5. doi:10.3389/fpsyg.2014.00639  
1093  
1094 Lohr B, Wright TF, Dooling RJ. 2003. Detection and discrimination of natural calls in masking  
1095 noise by birds: estimating the active space of a signal. *Anim Behav* 65:763–777.  
1096 doi:10.1006/anbe.2003.2093  
1097  
1098 Lu K, Xu Y, Yin P, Oxenham AJ, Fritz JB, Shamma SA. 2017. Temporal coherence structure  
1099 rapidly shapes neuronal interactions. *Nat Commun* 8:13900. doi:10.1038/ncomms13900  
1100  
1101 Lutfi RA, Kistler DJ, Oh EL, Wightman FL, Callahan MR. 2003. One factor underlies individual  
1102 differences in auditory informational masking within and across age groups. *Percept*  
1103 *Psychophys* 2003 65:396–406. doi:10.3758/BF03194571  
1104  
1105 Luther D, Gentry K. 2013. Sources of background noise and their influence on vertebrate  
1106 acoustic communication. *Behaviour* 150:1045–1068. doi:10.1163/1568539X-00003054  
1107  
1108 MacDougall-Shackleton SA, Hulse SH, Gentner TQ, White W. 1998. Auditory scene analysis by  
1109 European starlings (*Sturnus vulgaris*): Perceptual segregation of tone sequences. *J Acoust*  
1110 *Soc Am* 103:3581–3587. <https://doi.org/10.1121/1.423063>  
1111  
1112 McDermott JH. 2009. The cocktail party problem. *Curr Biol* 19:R1024–R1027.  
1113 doi:10.1016/j.cub.2009.09.005  
1114  
1115 Micheyl C, Hunter C, Oxenham AJ. 2010. Auditory stream segregation and the perception of  
1116 across-frequency synchrony. *J Exp Psychol: Hum Percept Perform* 36:1029–1039.  
1117 doi:10.1037/a0017601  
1118  
1119 Middlebrooks JC, Onsan ZA. 2012. Stream segregation with high spatial acuity. *J Acoust Soc*  
1120 *Am* 132:3896–3911. <https://doi.org/10.1121/1.4764879>  
1121  
1122 Middlebrooks JC, Simon JZ, Popper AN, Fay RR. (Eds). 2017. The auditory system at the  
1123 cocktail party. Vol 60. Springer, New York.  
1124  
1125 Murphy CG, Gerhardt HC. 1996. Evaluating the design of mate-choice experiments: The effect  
1126 of amplexus on mate choice by female barking treefrogs, *Hyla gratiosa*. *Anim Behav*  
1127 51:881–890. doi:10.1006/anbe.1996.0092  
1128  
1129 Narins PM, Feng AS, Shen J-X. 2007. Frogs communicate with ultrasound in noisy  
1130 environments. In: *Hearing – From Sensory Processing to Perception*. Springer, Berlin,  
1131 Heidelberg, pp 185–190  
1132  
1133 Neff DL, Dethlefs TM. 1995. Individual differences in simultaneous masking with random-



- 1134 frequency, multicomponent maskers. *J Acoust Soc Am* 98:125–134. doi:10.1121/1.413748  
1135
- 1136 Neff DL, Green DM. 1987. Masking produced by spectral uncertainty with multicomponent  
1137 maskers. *Percept Psychophys* 41:409–415. <https://doi.org/10.3758/bf03203033>  
1138
- 1139 Nie Y, Nelson PB. 2015. Auditory stream segregation using amplitude modulated bandpass  
1140 noise. *Front Psychol* 0:1151. doi:10.3389/FPSYG.2015.01151  
1141
- 1142 Nityananda V, Bee MA. 2012. Spatial release from masking in a free-field source identification  
1143 task by gray treefrogs. *Hear Res* 285:86–97. doi:10.1016/j.heares.2012.01.003  
1144
- 1145 Nityananda V, Bee MA. 2011. Finding your mate at a cocktail party: Frequency separation  
1146 promotes auditory stream segregation of concurrent voices in multi-species frog choruses.  
1147 *PLoS One* 6:e21191. doi:10.1371/journal.pone.0021191  
1148
- 1149 Oxenham AJ. 2013. Mechanisms and mechanics of auditory masking. *J Physiol* 591:2375.  
1150 doi:10.1113/jphysiol.2013.254490  
1151
- 1152 Oxenham AJ. 2008. Pitch perception and auditory stream segregation: implications for hearing  
1153 loss and cochlear implants. doi:10.1177/1084713808325881  
1154
- 1155 Pohl NU, Slabbekoorn H, Klump GM, Langemann U. 2009. Effects of signal features and  
1156 environmental noise on signal detection in the great tit, *Parus major*. *Anim Behav* 78:1293–  
1157 1300. doi:10.1016/j.anbehav.2009.09.005  
1158
- 1159 Ponnath A, Farris HE. 2014. Sound-by-sound thalamic stimulation modulates midbrain auditory  
1160 excitability and relative binaural sensitivity in frogs. *Front Neural Circuits* 8:.  
1161 <https://doi.org/10.3389/FNCIR.2014.00085>  
1162
- 1163 Recio-Spinoso A, Cooper NP. 2013. Masking of sounds by a background noise - cochlear  
1164 mechanical correlates. *J Physiol* 591:2705–2721. doi:10.1113/jphysiol.2012.248260  
1165
- 1166 Reichert MS, Höbel G. 2017. Frequency channel-dependent selectivity for temporal call  
1167 characteristics in gray treefrogs, *Hyla versicolor*. *J Exp Biol* 220:1256–1266.  
1168 <https://doi.org/10.1242/jeb.152330>  
1169
- 1170 Rochais C, Henry S, Hausberger M. 2017. Spontaneous attention-capture by auditory  
1171 distractors as predictor of distractibility: a study of domestic horses (*Equus caballus*). *Sci*  
1172 *Reports* 2017 7:1–8. doi:10.1038/s41598-017-15654-5  
1173
- 1174 Römer H. 2013. Masking by noise in acoustic insects: problems and solutions. *Animal*  
1175 *communication and noise*. Springer, Berlin, Heidelberg. pp. 33–63. doi:10.1007/978-3-  
1176 642-41494-7\_3  
1177
- 1178 Rosa P, Koper N. 2018. Integrating multiple disciplines to understand effects of anthropogenic  
1179 noise on animal communication: *Ecosphere* 9. doi:10.1002/ecs2.2127  
1180
- 1181 Rose GJ (2014) Time computations in anuran auditory systems. *Front. Physiol* 5:206  
1182
- 1183 Rose GJ, Brenowitz EA, Capranica RR. 1985. Species specificity and temperature dependency  
1184 of temporal processing by the auditory midbrain of two species of treefrogs. *J Comp*

- 1185           *Physiol A* 157:763–769. <https://doi.org/10.1007/bf01350073>  
1186  
1187   Rose GJ, Gooler DM. 2007. Function of the amphibian central auditory system. *Hear Sound*  
1188           *Commun Amphib* 250–290. [https://doi.org/10.1007/978-0-387-47796-1\\_9](https://doi.org/10.1007/978-0-387-47796-1_9)  
1189  
1190   Rose GJ, Hanson JL, Leary CJ, et al. 2015. Species-specificity of temporal processing in the  
1191           auditory midbrain of gray treefrogs: interval-counting neurons. *J Comp Physiol A*  
1192           Neuroethol Sensory, Neural, Behav Physiol 201:485–503. [https://doi.org/10.1007/s00359-](https://doi.org/10.1007/s00359-015-0997-4)  
1193           015-0997-4  
1194  
1195   Rose GJ, Leary CJ, Edwards CJ (2011) Interval-counting neurons in the anuran auditory  
1196           midbrain: Factors underlying diversity of interval tuning. *J Comp Physiol A* 197:97–108.  
1197           <https://doi.org/10.1007/s00359-010-0591-8>  
1198  
1199   Rosenthal GG. 2017. Mate choice: the evolution of sexual decision making from microbes to  
1200           humans. Princeton University Press. doi:10.1515/9781400885466  
1201  
1202   Ryan MJ, Rand AS. 2001. Feature weighting in signal recognition and discrimination by túngara  
1203           frogs. *Anuran Commun* 86–101  
1204  
1205   Schaub A, Ostwald J, Siemers BM. 2008. Foraging bats avoid noise. *J Exp Biol* 211:3174–  
1206           3180. doi:10.1242/jeb.022863  
1207  
1208   Schmidt AKD, Balakrishnan R. 2015. Ecology of acoustic signalling and the problem of masking  
1209           interference in insects. *J Comp Physiol A* 201:133–142. doi:10.1007/s00359-014-0955-6  
1210  
1211   Schrode KM, Buerkle NP, Brittan-Powell EF, Bee MA. 2014. Auditory brainstem responses in  
1212           Cope’s gray treefrog (*Hyla chrysoscelis*): Effects of frequency, level, sex and size. *J Comp*  
1213           *Physiol A* 200:221–238. doi:10.1007/s00359-014-0880-8  
1214  
1215   Schul J, Bush SL. 2002. Non-parallel coevolution of sender and receiver in the acoustic  
1216           communication system of treefrogs. *Proc R Soc B Biol Sci* 269:1847–1852.  
1217           doi:10.1098/rspb.2002.2092  
1218  
1219   Schwartz JJ, Bee MA. 2013. Anuran acoustic signal production in noisy environments. *Animal*  
1220           *communication and noise*. Springer, Berlin, Heidelberg. pp. 91–132. doi:10.1007/978-3-  
1221           642-41494-7\_5  
1222  
1223   Schwartz JJ, Buchanan BW, Gerhardt HC. 2001. Female mate choice in the gray treefrog (*Hyla*  
1224           *versicolor*) in three experimental environments. *Behav Ecol Sociobiol* 49:443–455.  
1225           <https://doi.org/10.1007/s002650100317>  
1226  
1227   Schwartz JJ, Gerhardt HC. 1995. Directionality of the auditory system and call pattern  
1228           recognition during acoustic interference in the gray treefrog, *Hyla versicolor*. *Audit Neurosci*  
1229           1:195–206  
1230  
1231   Schwartz JJ, Serratto Del Monte ME. 2019. Spatially-mediated call pattern recognition and the  
1232           cocktail party problem in treefrog choruses: can call frequency differences help during  
1233           signal overlap? *Bioacoustics* 28:312–328. <https://doi.org/10.1080/09524622.2018.1443836>  
1234  
1235   Scott, S. K., Rosen, S., Wickham, L., & Wise RJ. 2004. A positron emission tomography study

- 1236 of the neural basis of informational and energetic masking effects in speech perception. *J*  
1237 *Acoust Soc Am* 115:813–821. doi:10.1121/1.1639336
- 1238
- 1239 Shamma S, Elhilali M, Ma L, Micheyl C, Oxenham AJ, Pressnitzer D, Yin P, Xu Y. 2013.  
1240 Temporal coherence and the streaming of complex sounds. *Advances in Experimental*  
1241 *Medicine and Biology*. pp. 535–543. doi:10.1007/978-1-4614-1590-9-59
- 1242
- 1243 Shinn-Cunningham B. 2013. Understanding informational masking from a neural perspective.  
1244 *Proceedings of Meetings on Acoustics*. p. 60143. Acoustical Society of America  
1245 doi:10.1121/1.4799846
- 1246
- 1247 Siemers BM, Schaub A. 2011. Hunting at the highway: traffic noise reduces foraging efficiency  
1248 in acoustic predators. *Proc R Soc B Biol Sci* 278:1646–1652. doi:10.1098/rspb.2010.2262
- 1249
- 1250 Simmons DD, Meenderink SWF, Vassilakis PN. 2006. Anatomy, Physiology, and Function of  
1251 Auditory End-Organs in the Frog Inner Ear. *Hearing and Sound Communication in*  
1252 *Amphibians*. pp. 184–220. doi:10.1007/978-0-387-47796-1\_7
- 1253
- 1254 Simpson SD, Radford AN, Nedelec SL, Ferrari MCO, Chivers DP, McCormick MI, Meekan MG.  
1255 2016. Anthropogenic noise increases fish mortality by predation. *Nat Commun* 2015 71  
1256 7:1–7. doi:10.1038/ncomms10544
- 1257
- 1258 Slabbekoorn H, Dooling J, Popper A, Fay R. 2018. Effects of anthropogenic noise on animals.  
1259 doi:10.1007/978-1-4939-8574-6
- 1260
- 1261 Snyder JS, Elhilali M. 2017. Recent advances in exploring the neural underpinnings of auditory  
1262 scene perception. *Ann N Y Acad Sci* 1396:39–55. doi:10.1111/nyas.13317
- 1263
- 1264 Swaminathan J, Mason CR, Streeter TM, Best V, Kidd G, Patel AD. 2015. Musical training,  
1265 individual differences and the cocktail party problem. *Sci Rep* 5:1–11.  
1266 doi:10.1038/srep11628
- 1267
- 1268 Tanner JC, Bee MA. 2020. Inconsistent sexual signaling degrades optimal mating decisions in  
1269 animals. *Sci Adv* 6:3957–3972. doi:10.1126/sciadv.aax3957
- 1270
- 1271 Tanner JC, Bee MA. 2019. Within-individual variation in sexual displays: signal or noise? *Behav*  
1272 *Ecol* 30:80–91. doi:10.1093/BEHECO/ARY165
- 1273
- 1274 Tanner JC, Ward JL, Shaw RG, Bee MA. 2017. Multivariate phenotypic selection on a complex  
1275 sexual signal. *Evolution* 71:1742–1754. <https://doi.org/10.1111/evo.13264>
- 1276
- 1277 Vélez A, Bee MA. 2011. Dip listening and the cocktail party problem in grey treefrogs: Signal  
1278 recognition in temporally fluctuating noise. *Anim Behav* 82:1319–1327.  
1279 doi:10.1016/j.anbehav.2011.09.015
- 1280
- 1281 Vélez A, Bee MA. 2010. Signal recognition by frogs in the presence of temporally fluctuating  
1282 chorus-shaped noise. *Behav Ecol Sociobiol* 64:1695–1709. doi:10.1007/s00265-010-0983-  
1283 3
- 1284
- 1285 Vélez A, Gordon NM, Bee MA. 2017. The signal in noise: acoustic information for soundscape  
1286 orientation in two North American tree frogs. *Behav Ecol* 28:844–853.

- 1287 <https://doi.org/10.1093/beheco/arx044>  
1288  
1289 Vélez A, Linehan-Skillings BJ, Gu Y, Sun Y, Bee MA. 2013a. Pulse-number discrimination by  
1290 Cope's gray treefrog (*Hyla chrysoscelis*) in modulated and unmodulated noise. *J Acoust*  
1291 *Soc Am* 134:3079–3089. doi:10.1121/1.4820883  
1292  
1293 Vélez A, Schwartz JJ, Bee MA. 2013b. Anuran Acoustic Signal Perception in Noisy  
1294 Environments 133–185. doi:10.1007/978-3-642-41494-7\_6  
1295  
1296 Ward JL, Love EK, Vélez A, Buerkle NP, O'Bryan LR, Bee MA. 2013a. Multitasking males and  
1297 multiplicative females: Dynamic signalling and receiver preferences in Cope's grey  
1298 treefrog. *Anim Behav* 86:231–243. doi:10.1016/j.anbehav.2013.05.016  
1299  
1300 Ward JL, Buerkle NP, Bee MA. 2013b. Spatial release from masking improves sound pattern  
1301 discrimination along a biologically relevant pulse-rate continuum in gray treefrogs. *Hear*  
1302 *Res* 306:63–75. <https://doi.org/10.1016/j.heares.2013.09.006>  
1303  
1304 Welch AM, Semlitsch RD, Gerhardt HC. 1998. Call duration as an indicator of genetic quality in  
1305 male gray tree frogs. *Science (80- )* 280:1928–1930. doi:10.1126/science.280.5371.1928  
1306  
1307 Welch AM, Smith MJ, Gerhardt HC. 2014. A multivariate analysis of genetic variation in the  
1308 advertisement call of the gray treefrog, *Hyla versicolor*. *Evolution* 68:1629–1639.  
1309 doi:10.1111/evo.12397  
1310  
1311 Wightman FL, Kistler DJ, O'Bryan A. 2010. Individual differences and age effects in a dichotic  
1312 informational masking paradigm. *J Acoust Soc Am* 128:270. doi:10.1121/1.3436536  
1313  
1314 Wiley RH. 2015. Noise matters: the evolution of communication. Harvard University Press.  
1315  
1316 Wollerman L, Wiley RH. 2002. Background noise from a natural chorus alters female  
1317 discrimination of male calls in a neotropical frog. *Anim Behav* 63:15–22.  
1318 doi:10.1006/anbe.2001.1885  
1319  
1320 Zhang M, Alamatsaz N, Ihlefeld A. 2021. Hemodynamic responses link individual differences in  
1321 informational masking to the vicinity of superior temporal gyrus. *Front Neurosci* 0:677.  
1322 doi:10.3389/FNINS.2021.675326  
1323  
1324
